# Supplementary material for: An Easy Access to Furan-Fused Polyheterocyclic Systems
Source: MDPI journal article supplement (doi:10.3390/molecules27103147), 2022-05-14

# Supplementary Materials

## An Easy Access to Furan Fused Polyheterocyclic Systems

*Alice Benzi<sup>1</sup>, Lara Bianchi<sup>2</sup>, Gianluca Giorgi<sup>2</sup>, Massimo Maccagno<sup>1</sup>, Giovanni Petrillo<sup>1</sup>, Domenico Spinelli<sup>3</sup>  
and Cinzia Tavani<sup>1,\*</sup>*

<sup>1</sup> Dipartimento di Chimica e Chimica Industriale, Università degli Studi di Genova, Via Dodecaneso 31, 16146 Genova, Italy; cinzia.tavani@unige.it (C.T.); massimo.maccagno@unige.it (M.M.); lara.bianchi@unige.it (L.B.); giovanni.petrillo@unige.it

<sup>2</sup> Dipartimento di Biotecnologie, Chimica e Farmacia, Università di Siena, Via A. Moro, 53100 Siena, Italy; gianluca.giorgi@unisi.it

<sup>3</sup> Dipartimento di Chimica "G. Ciamician", Alma Mater Studiorum-University of Bologna, via F. Selmi 2, 40126 Bologna, Italy; domenico.spinelli@unibo.it

\* Correspondence: [cinzia.tavani@unige.it](mailto:cinzia.tavani@unige.it)

### *Table of Contents*

<sup>1</sup>H and <sup>13</sup>C NMR spectra for all compounds

S2-29

IGDS1\_ff11-16\_RP\_EP\_CM  
single\_pulse

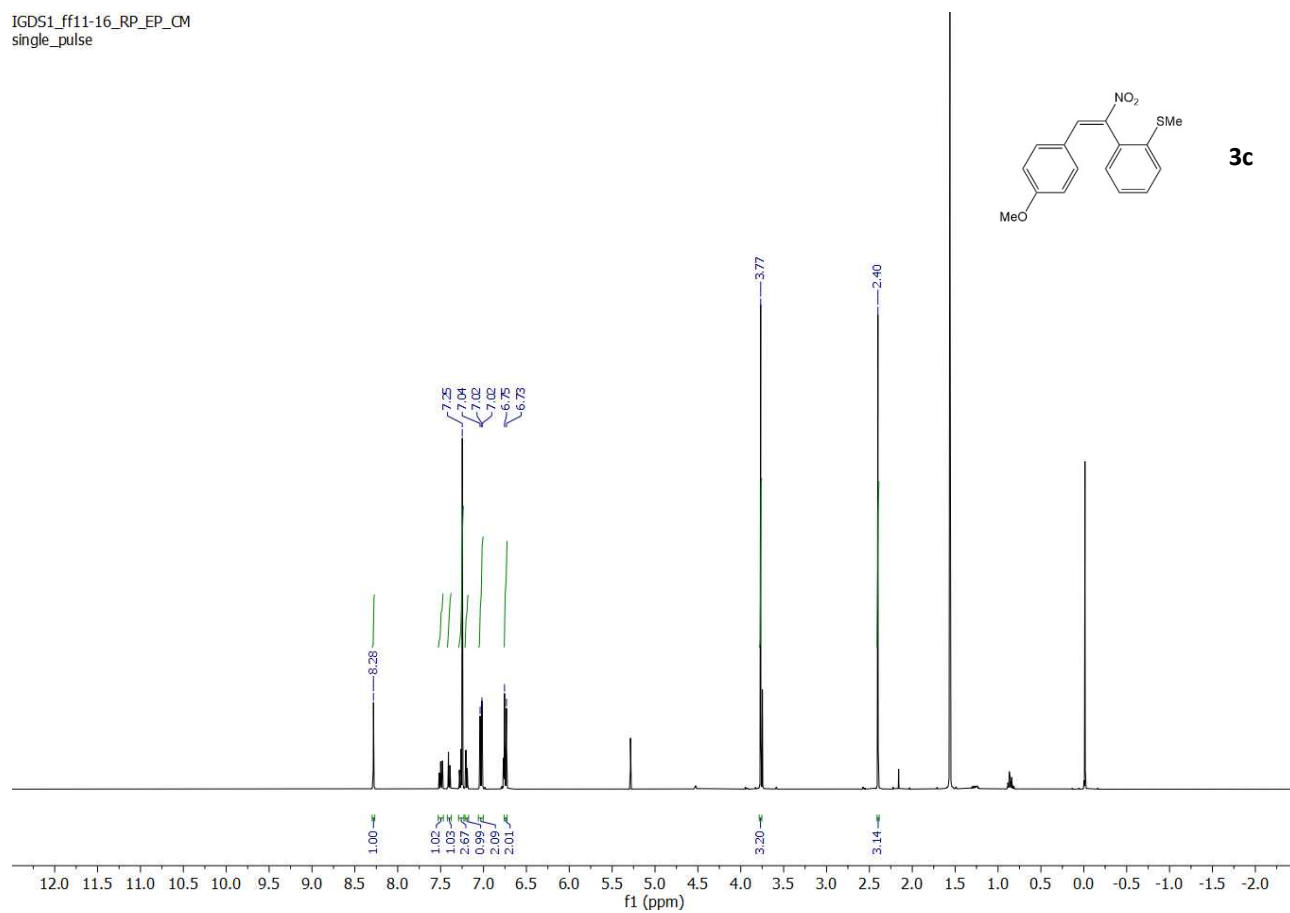

IIAS6\_ripreso  
single\_pulse decoupled gated NOE

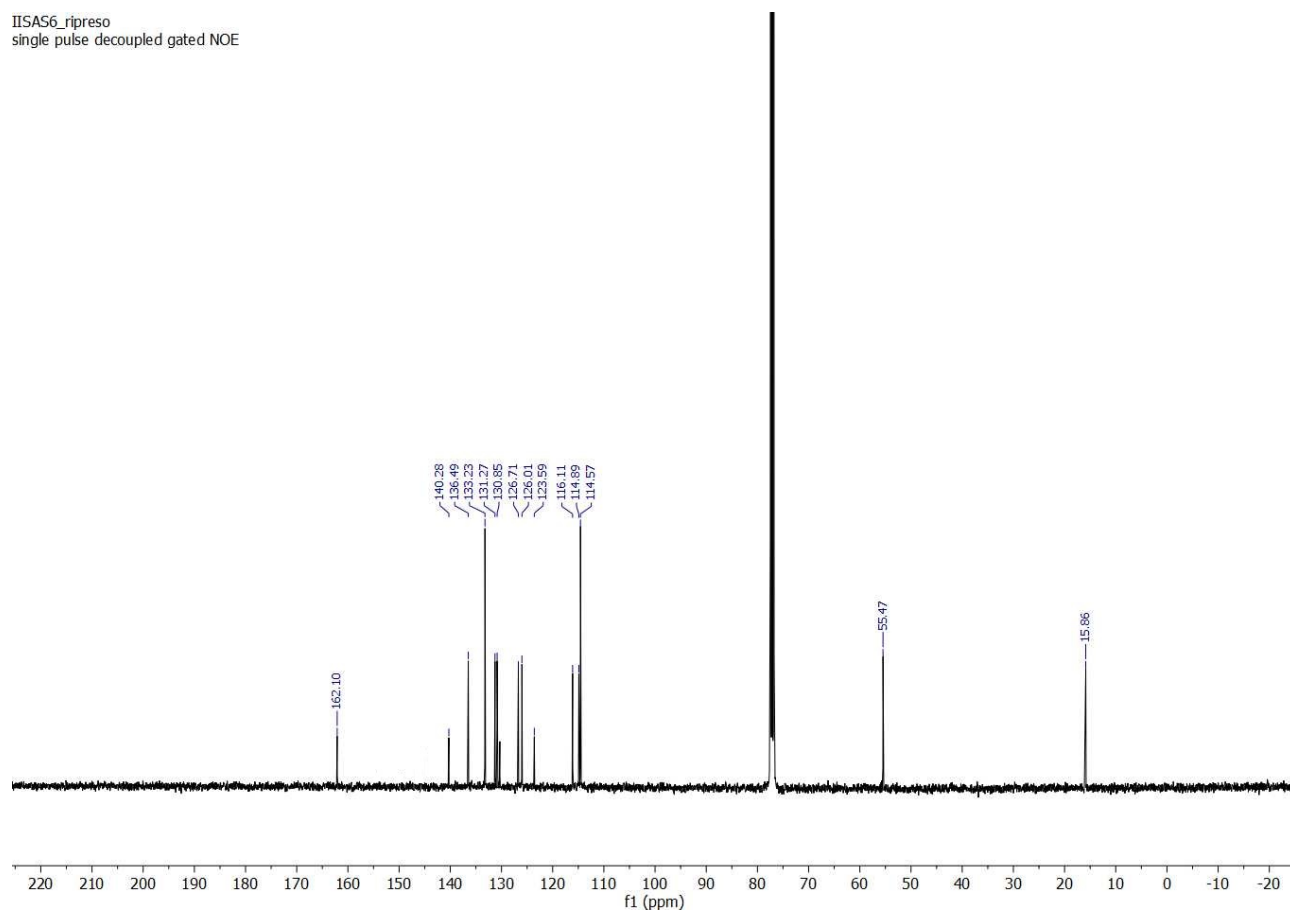

IGDS2\_grezzo  
single\_pulse

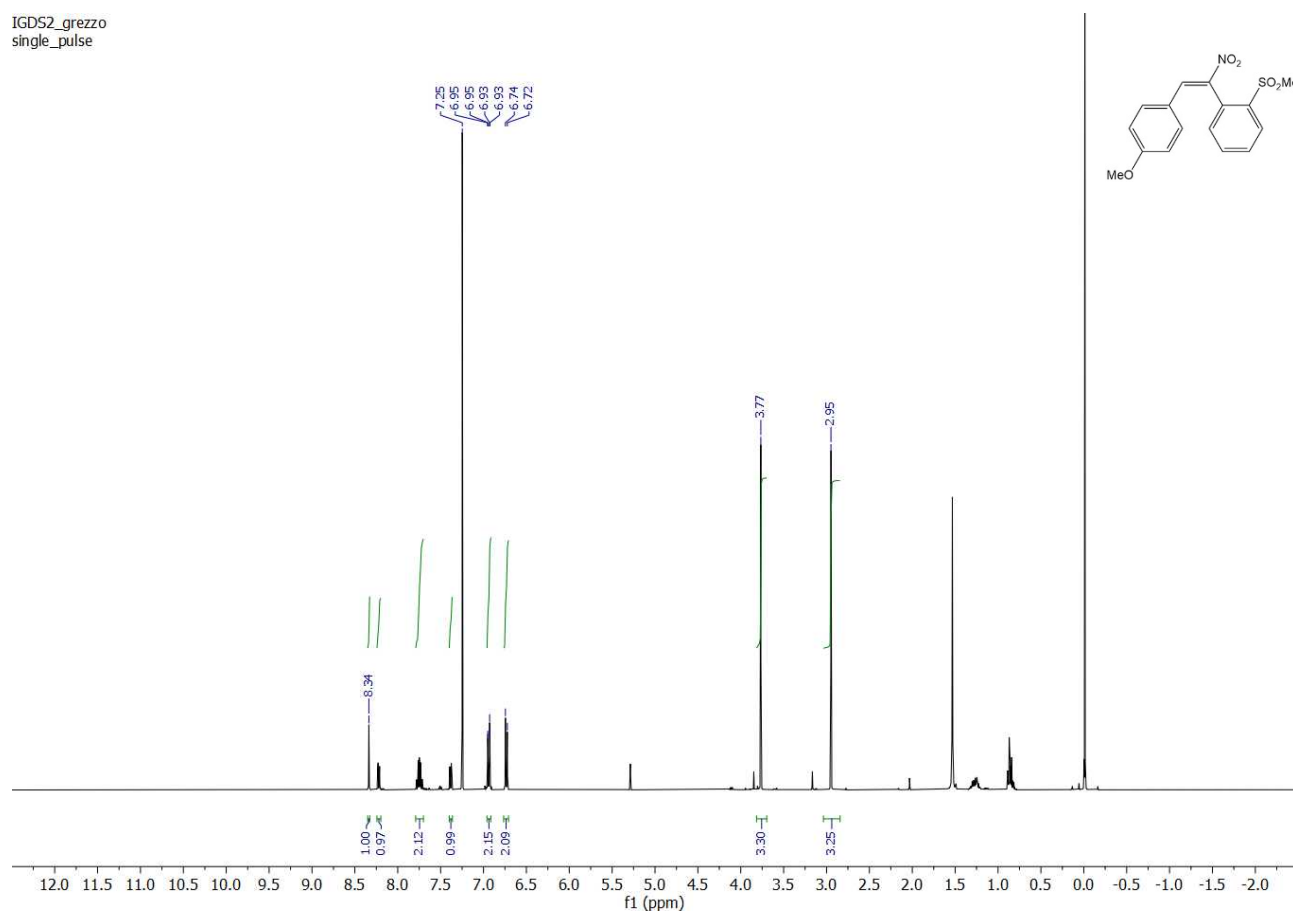

IGDS2  
single\_pulse decoupled gated NOE

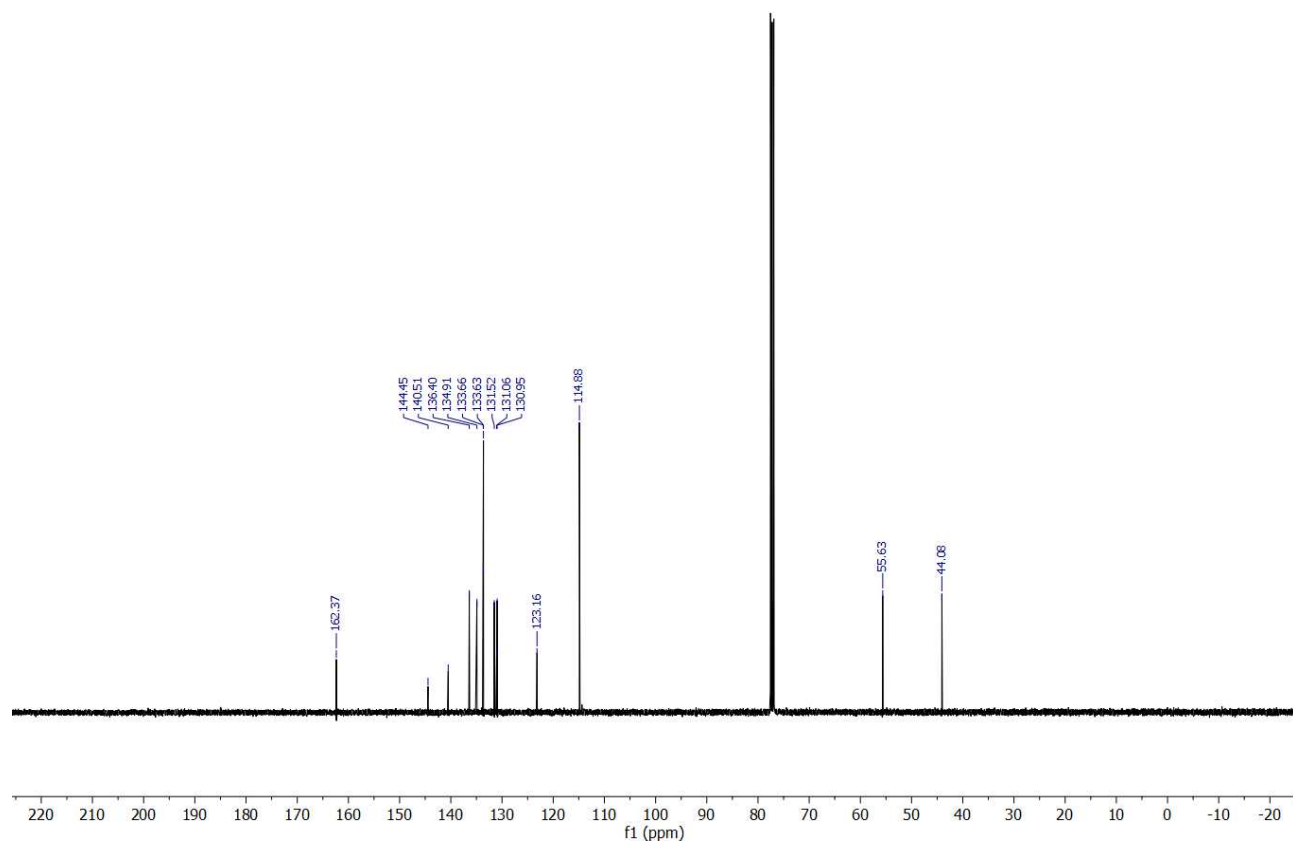

VBNZ68\_npEP

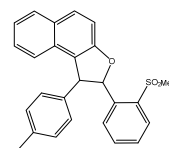

5a

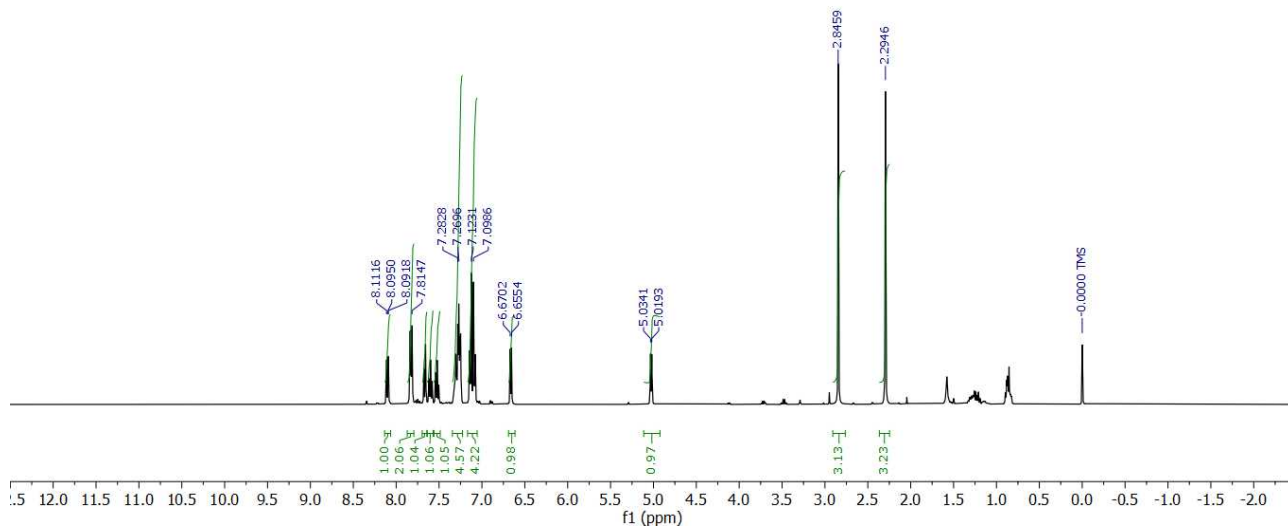

VBNZ68\_npEP

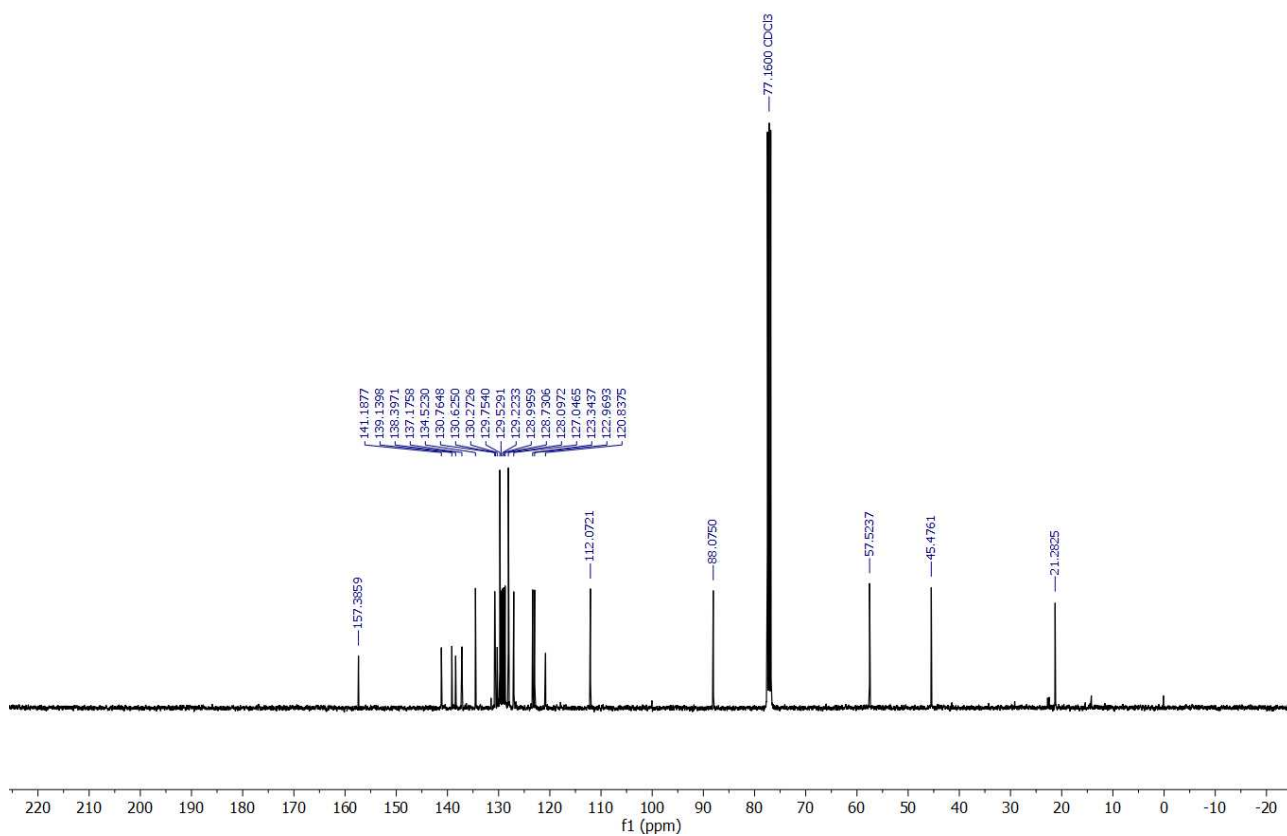



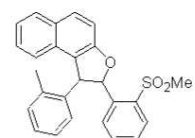**5b**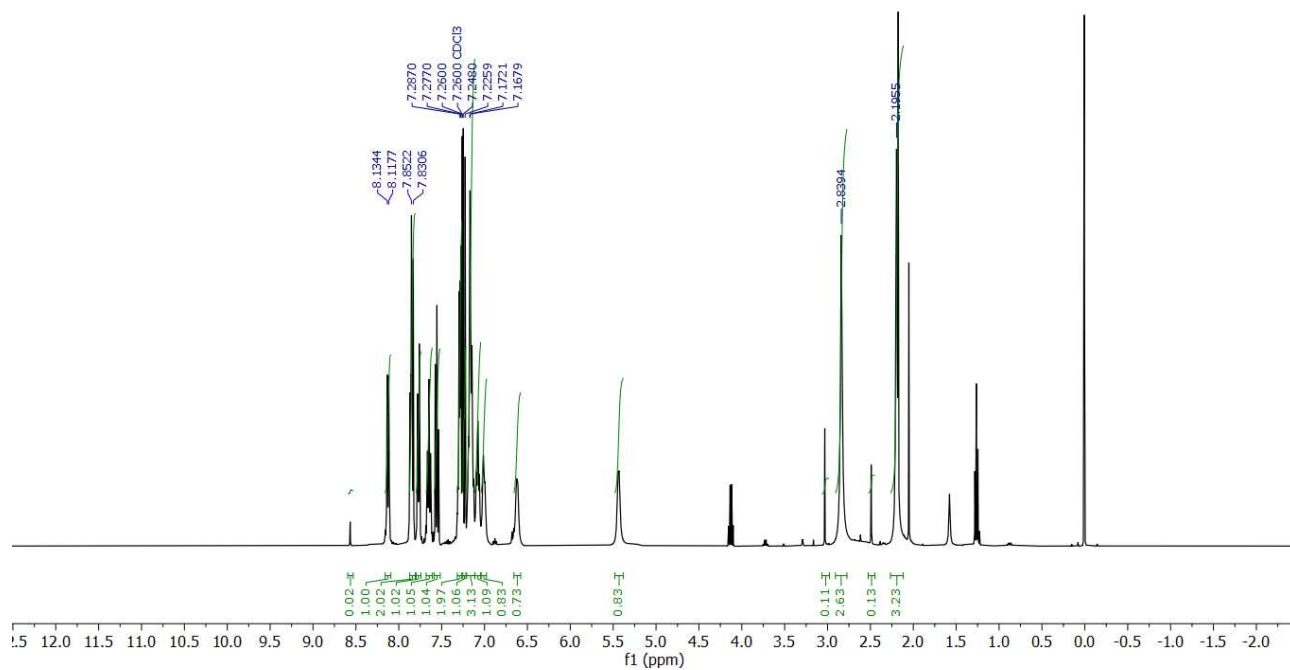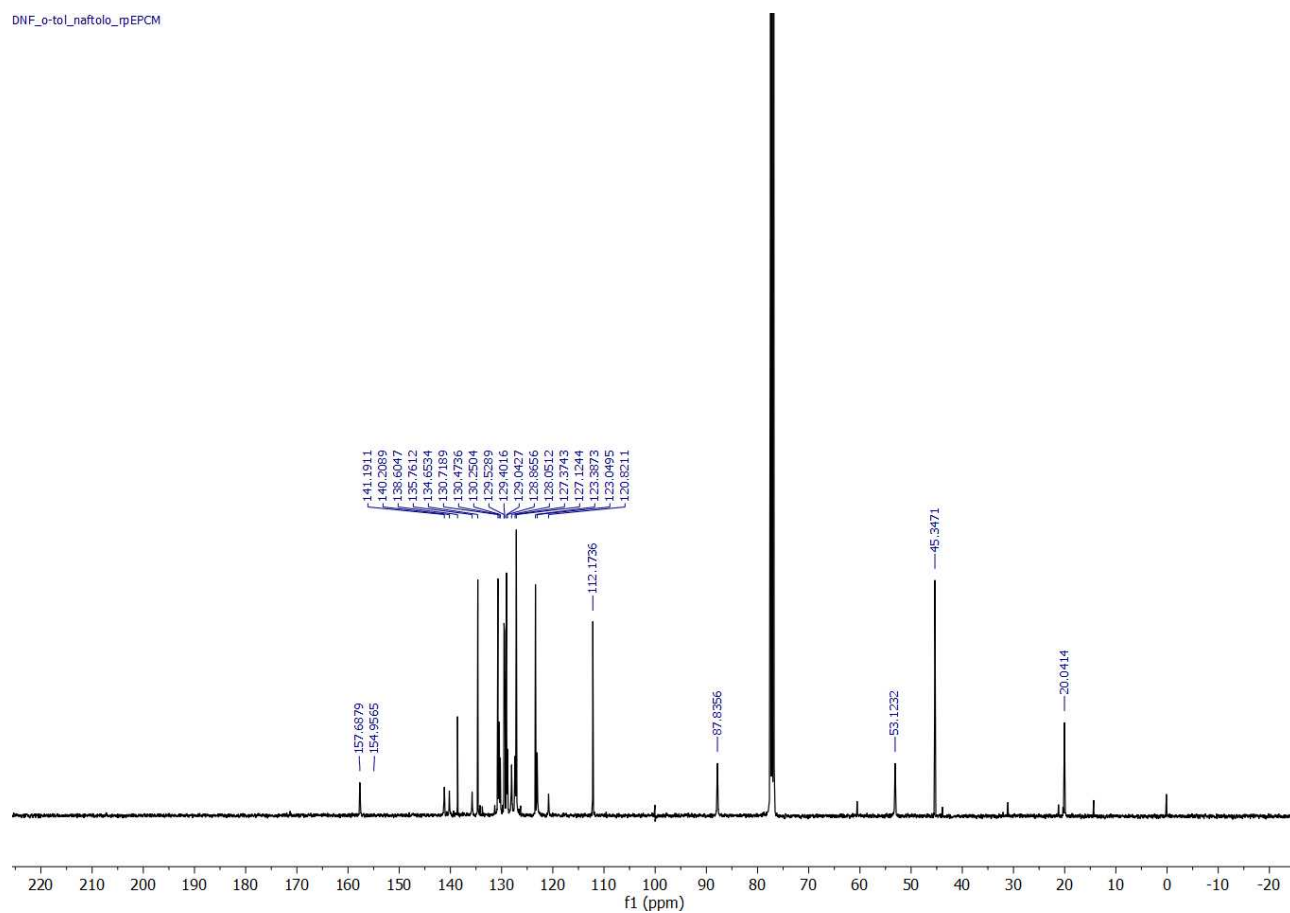

IGD54\_xxEtOH

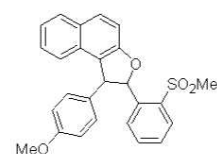

5c

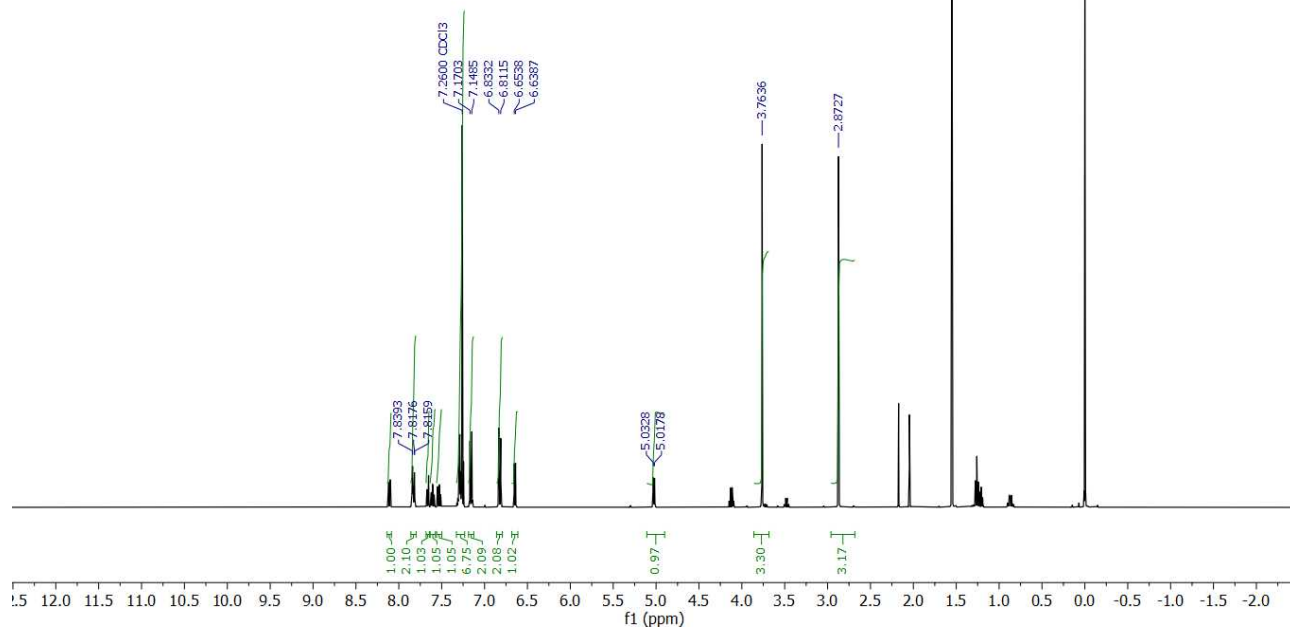

IGD54\_xxEtOH

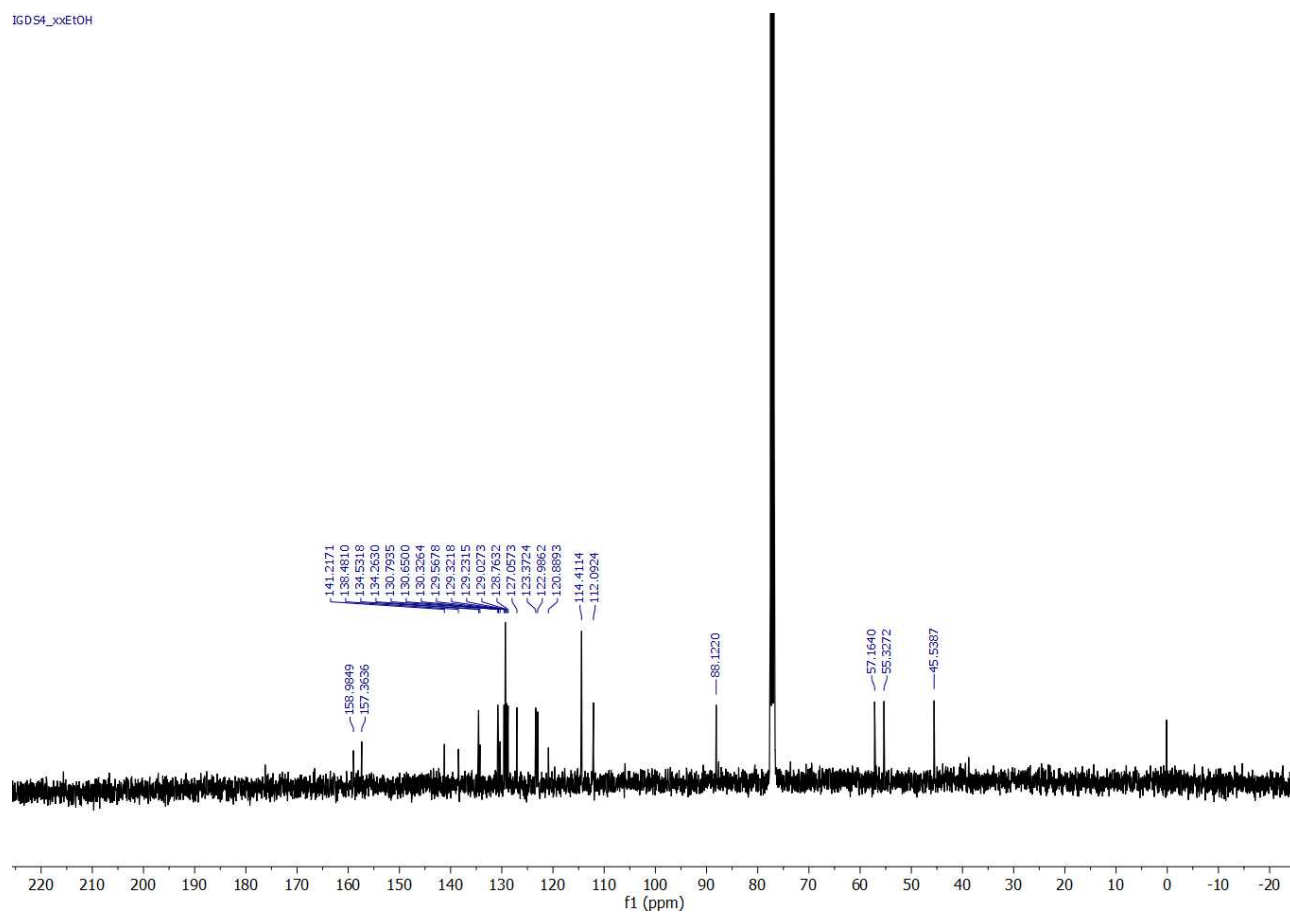

V18NZ13\_grezzo

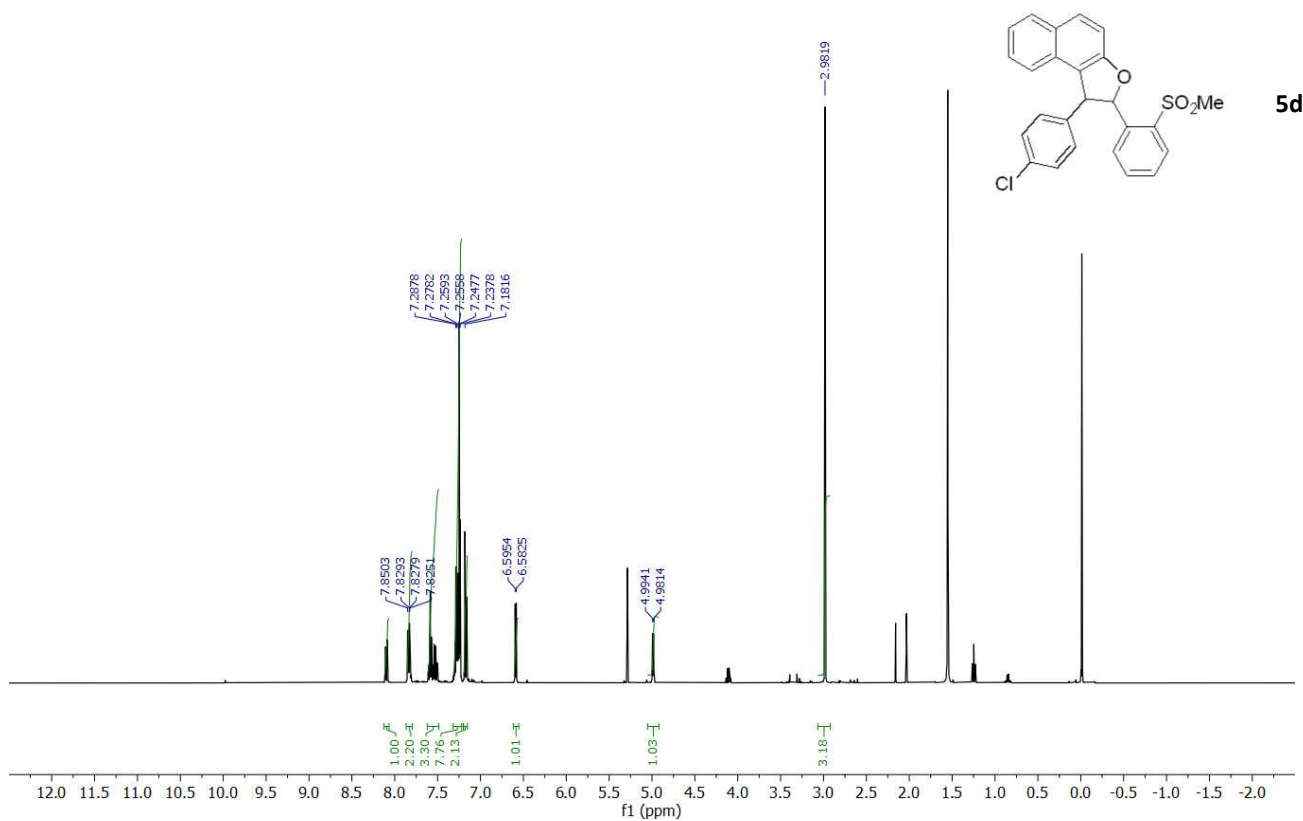

V18NZ77\_grezzo

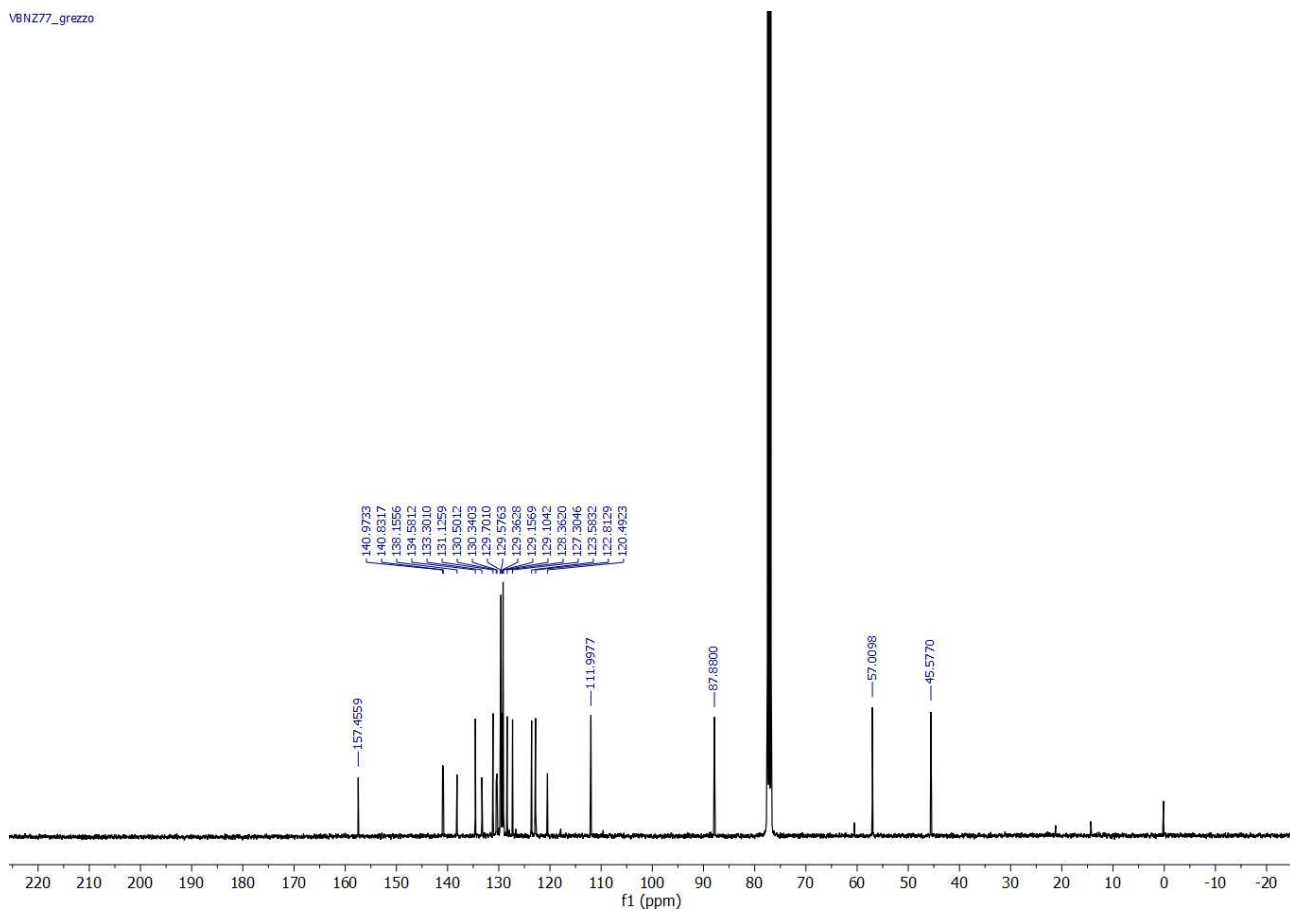

IGD55\_xxEPCM

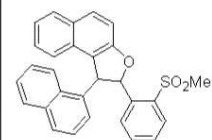

5e

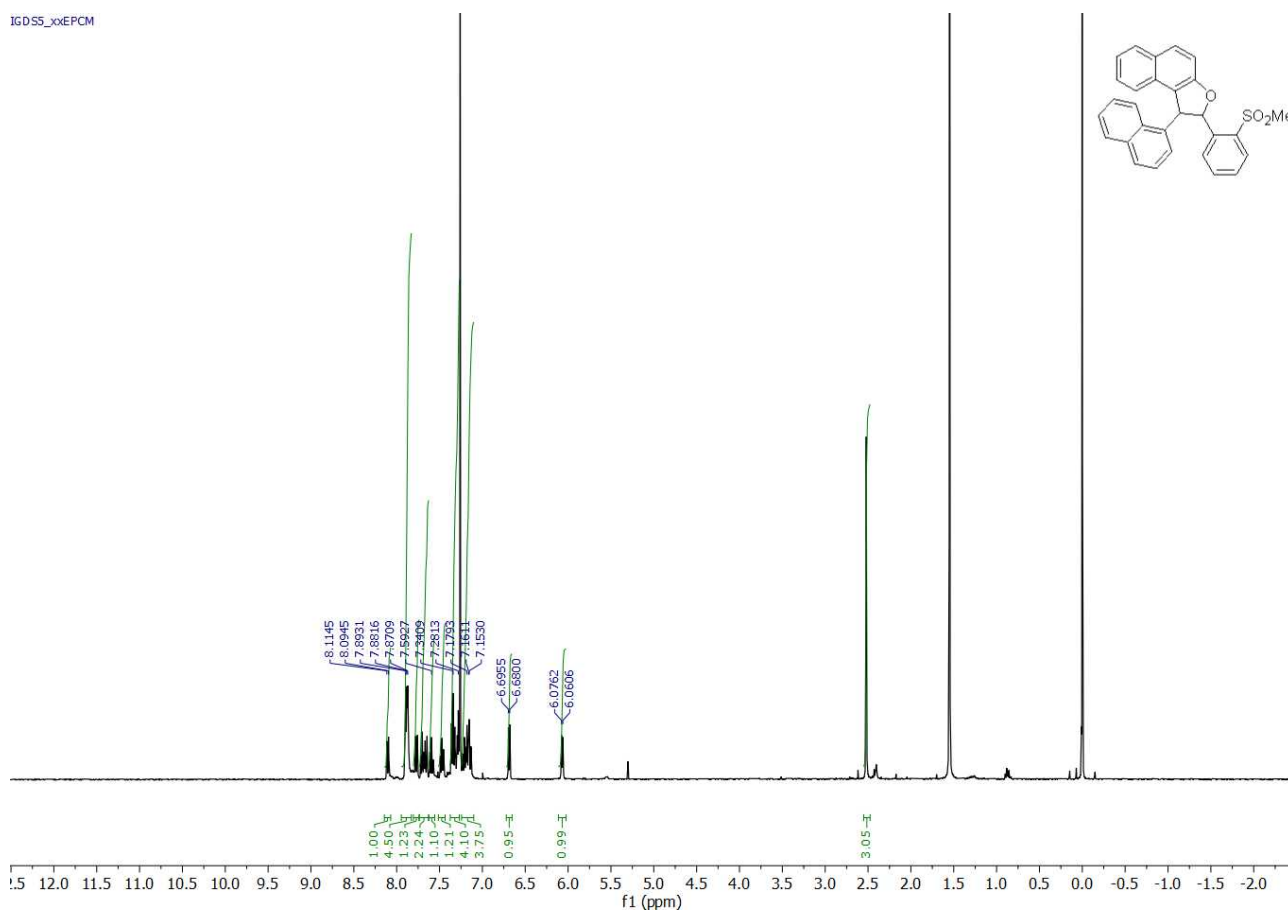

IGD55\_xxEPCM

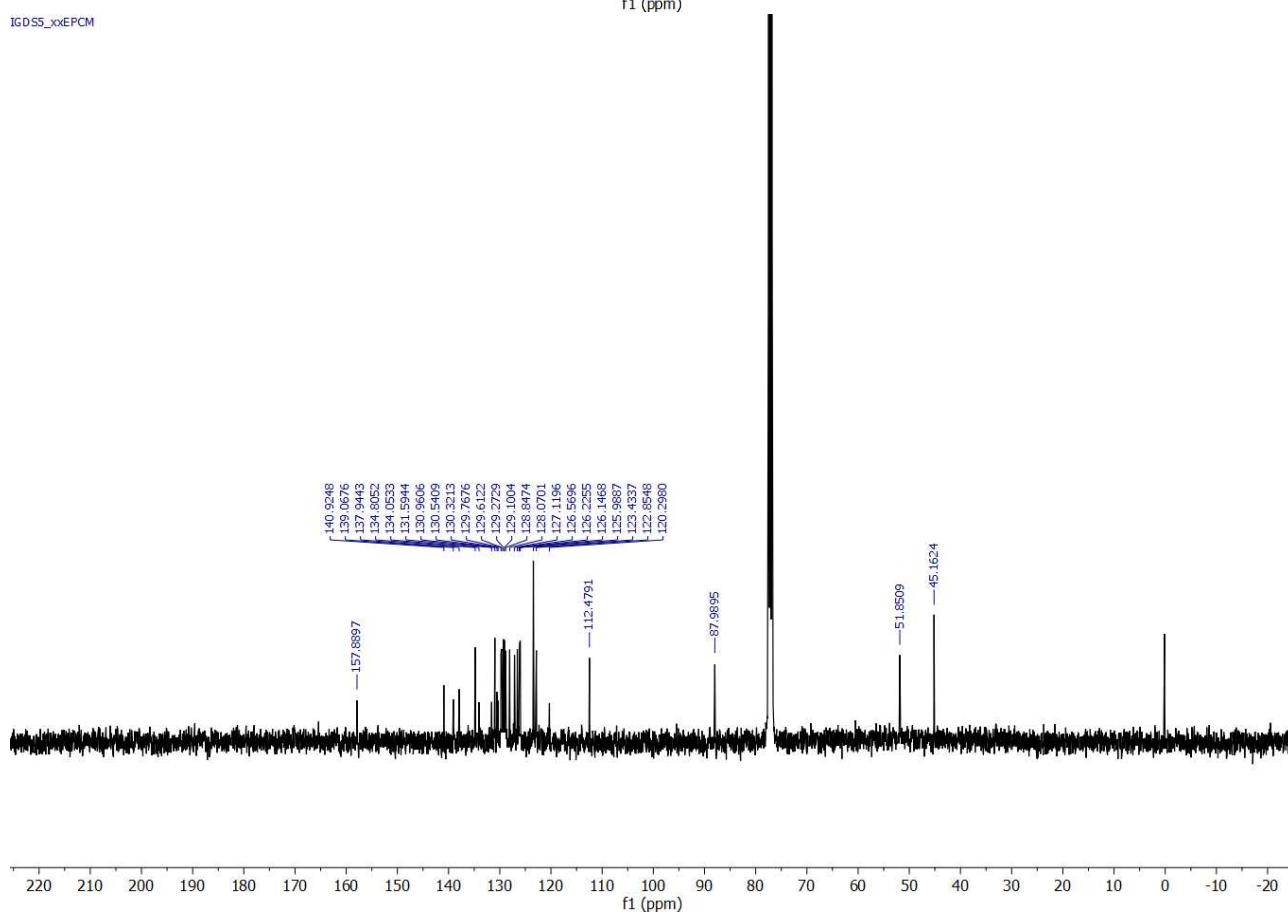

DNF\_2-Th\_IGDS14

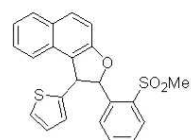

5f

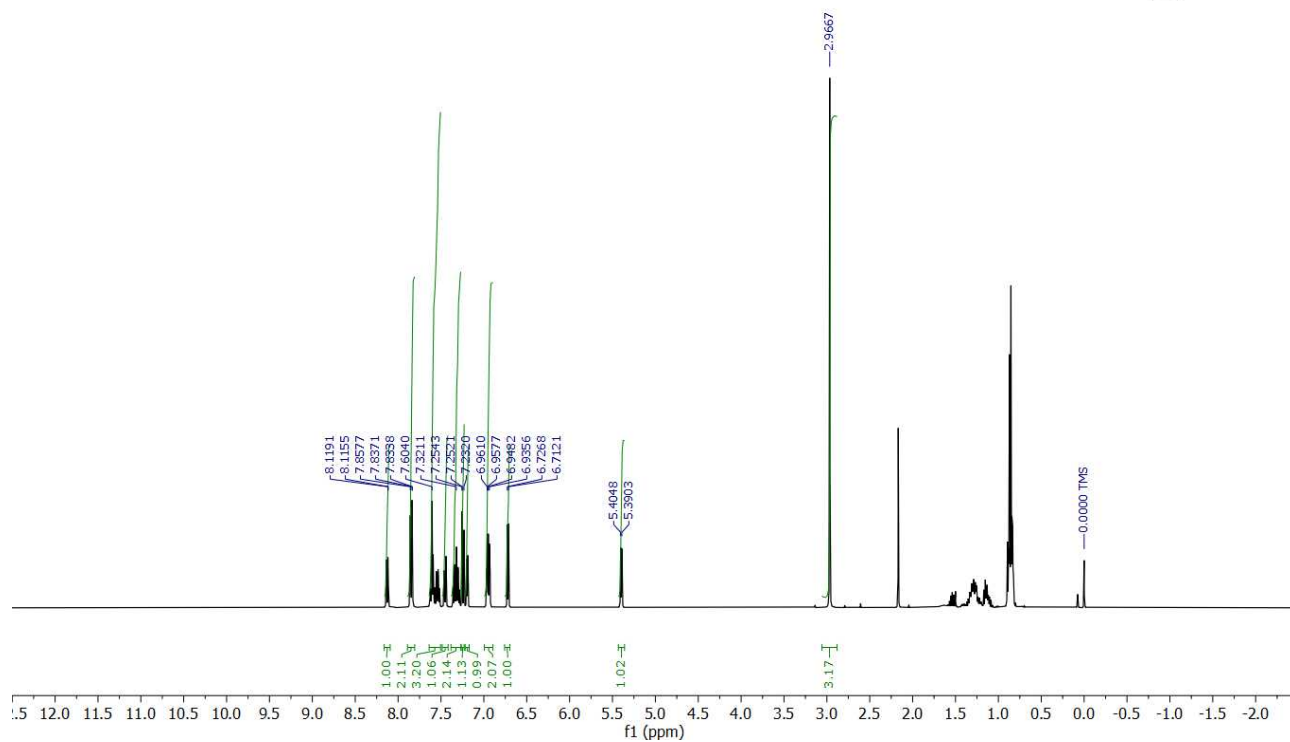

DNF\_2-Th\_IGDS14

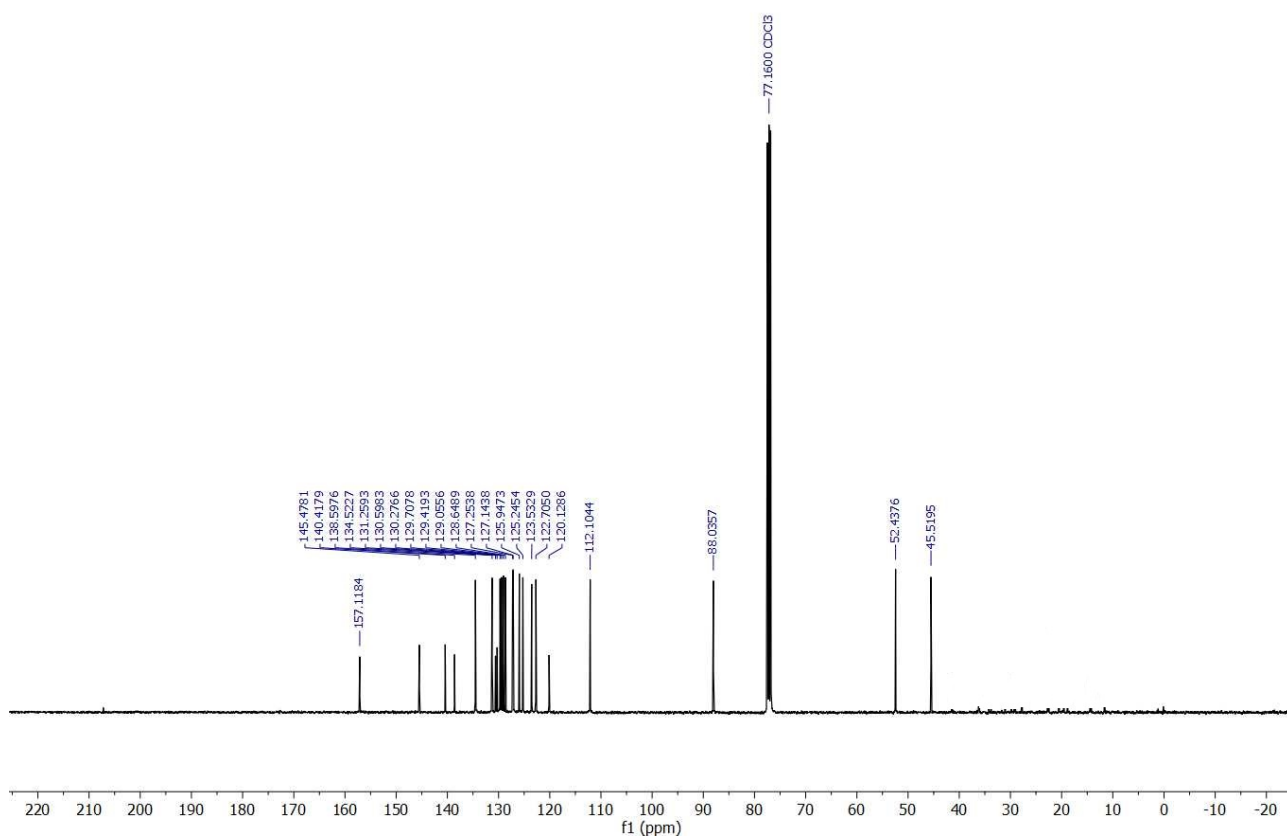

VBNZ71\_xxEtOH

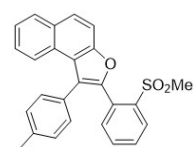

6a

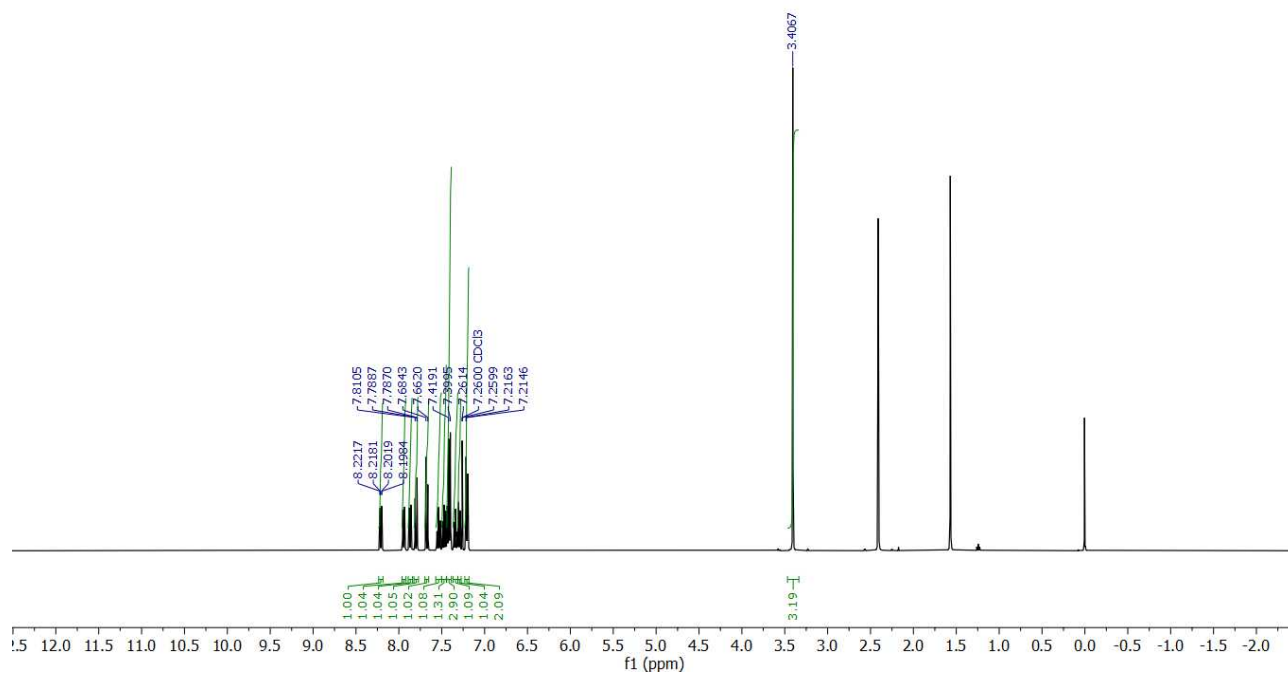

VBNZ71\_xxEtOH

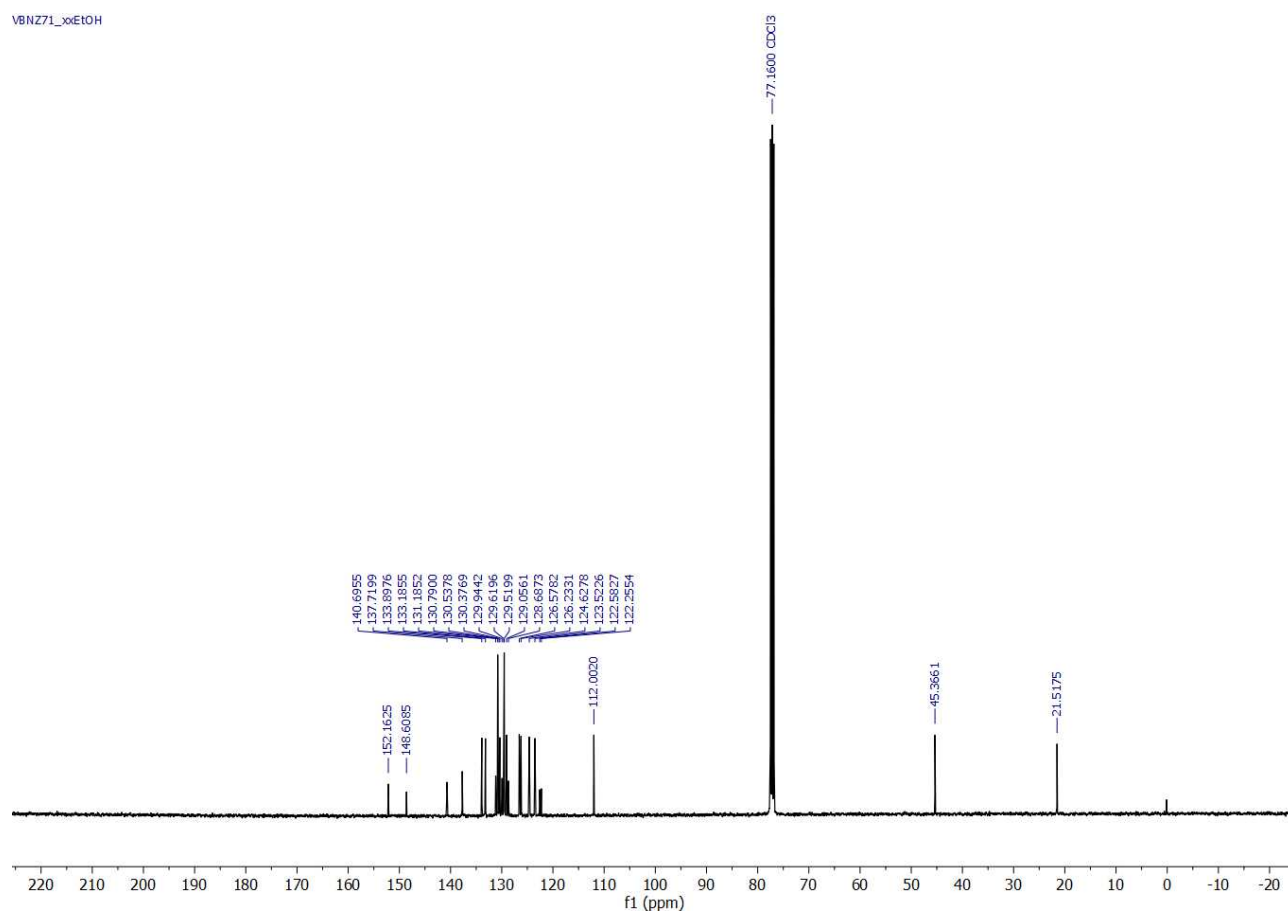

NF\_o-tol\_naftolo\_V1BNZ16

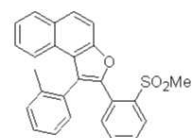

6b

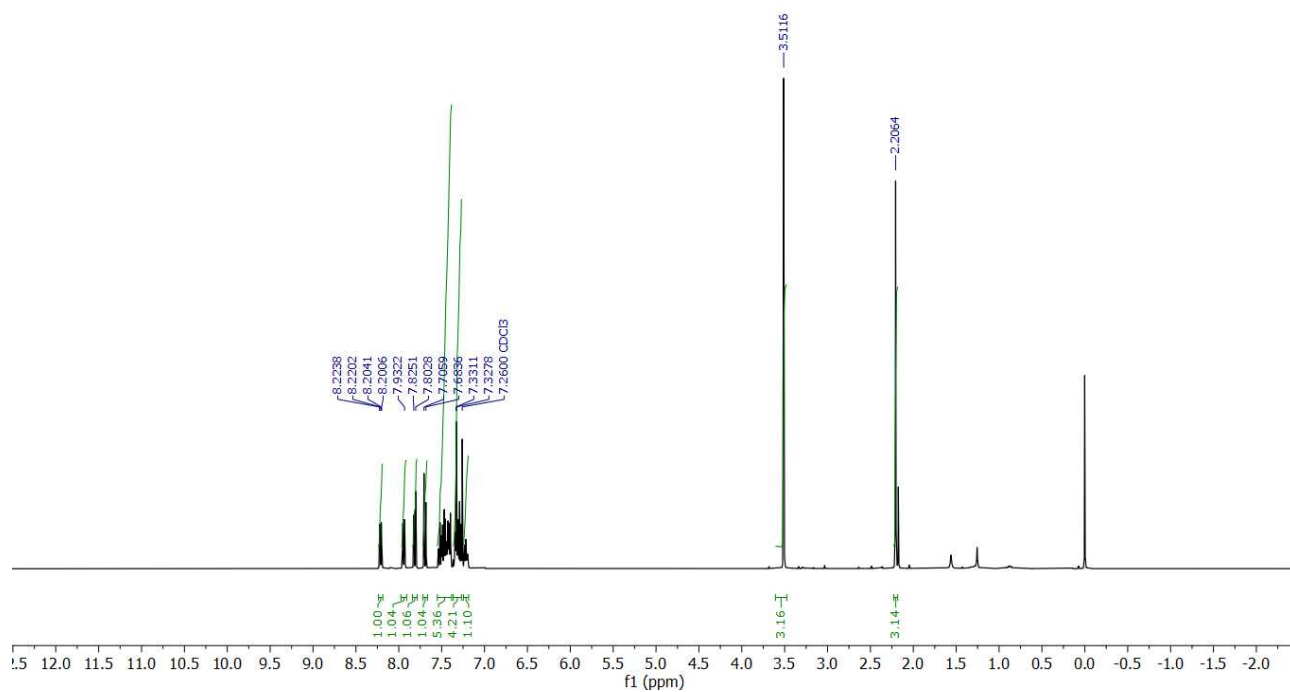

NF\_o-tol\_naftolo\_V1BNZ16

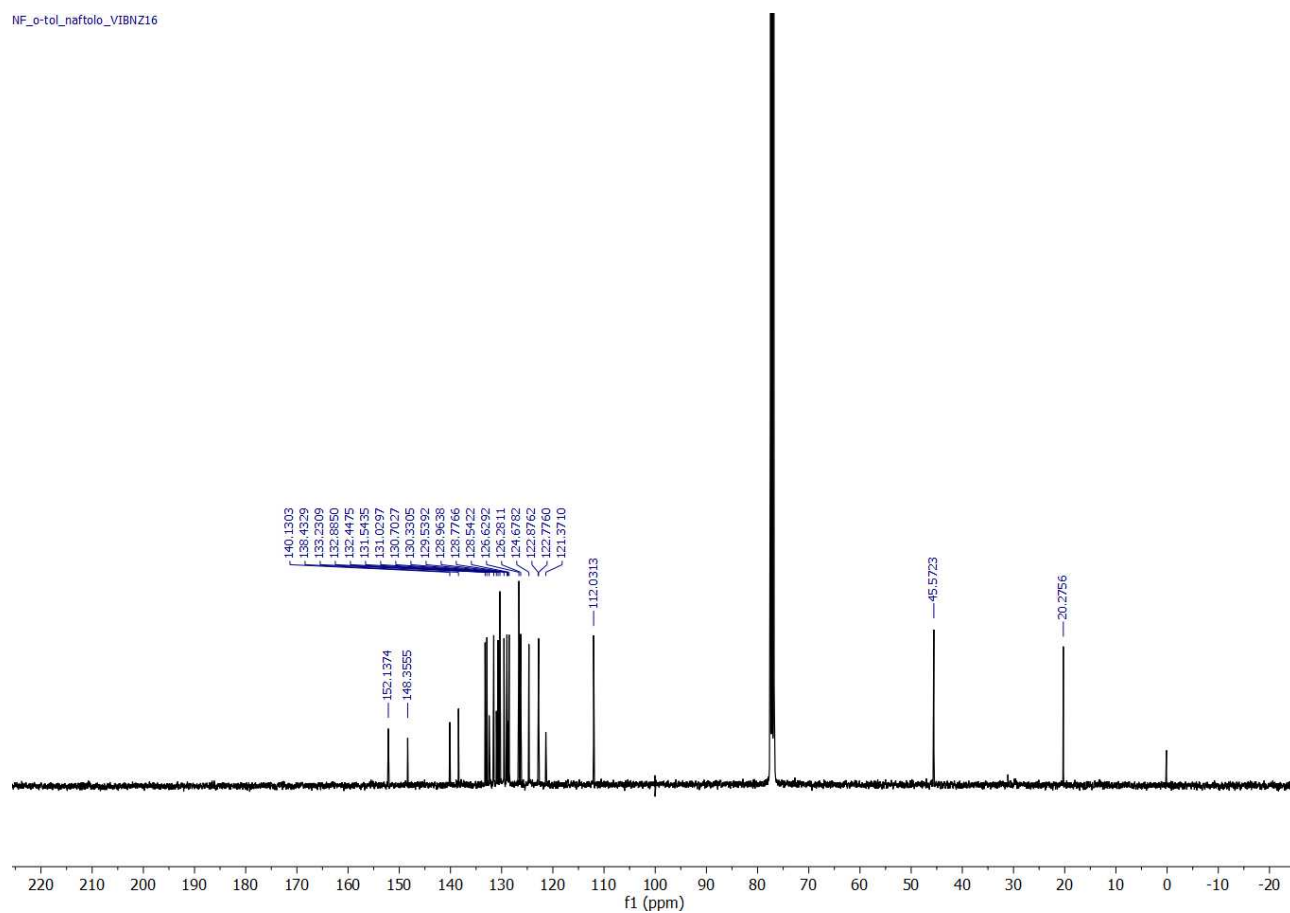

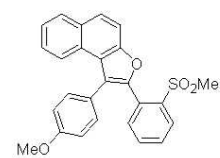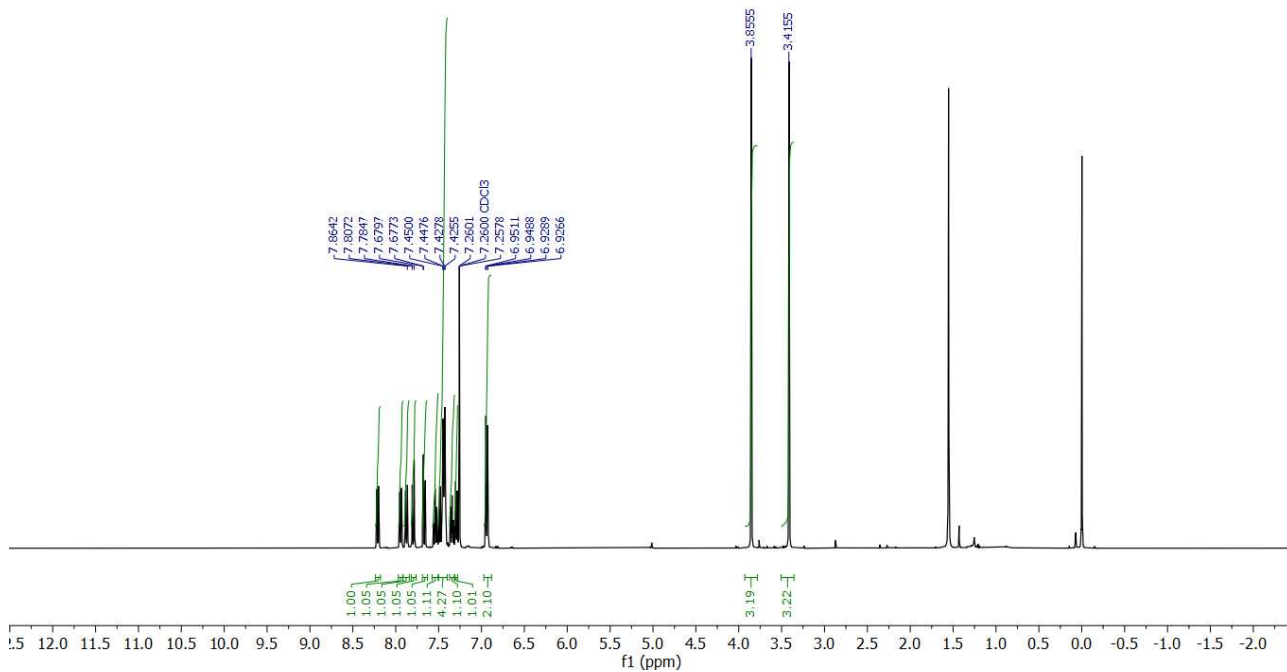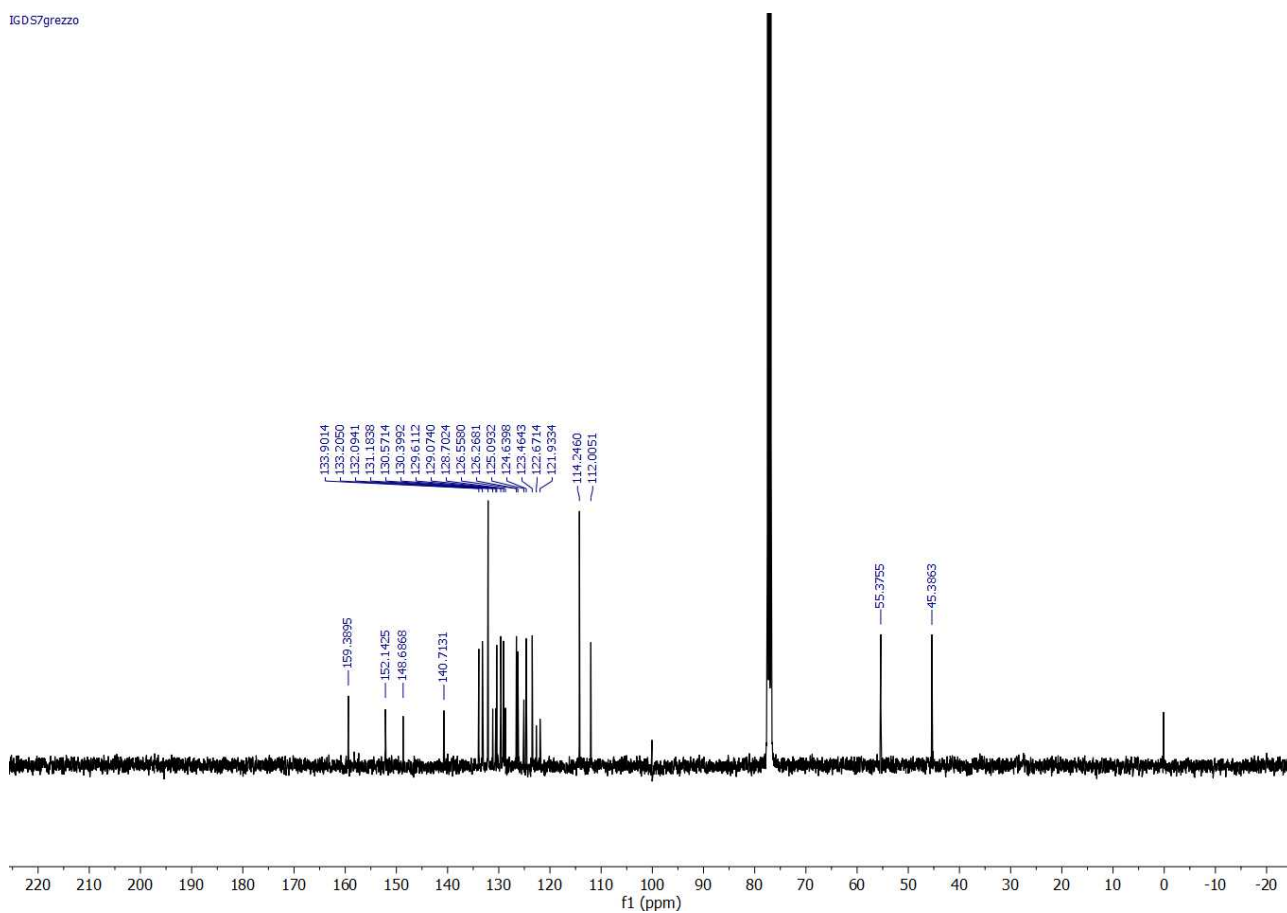



VIBNZ15\_3-10

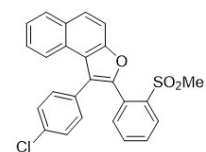

6d

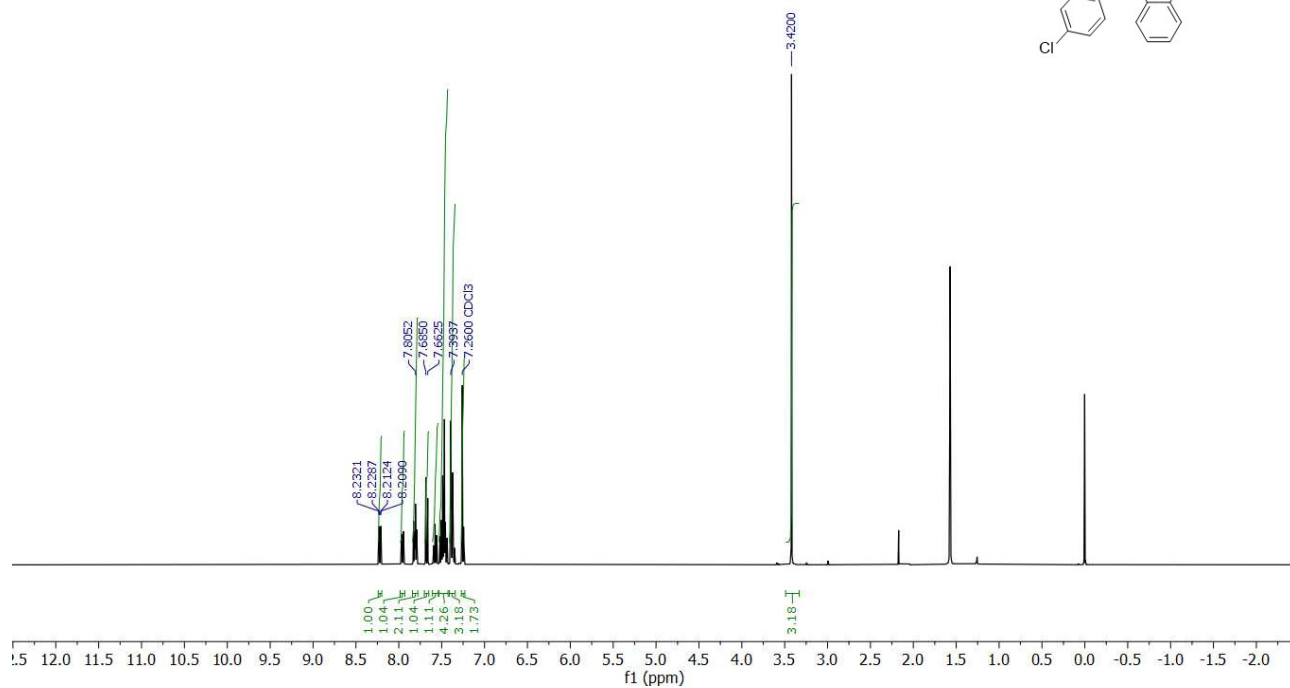

VIBNZ15\_3-10

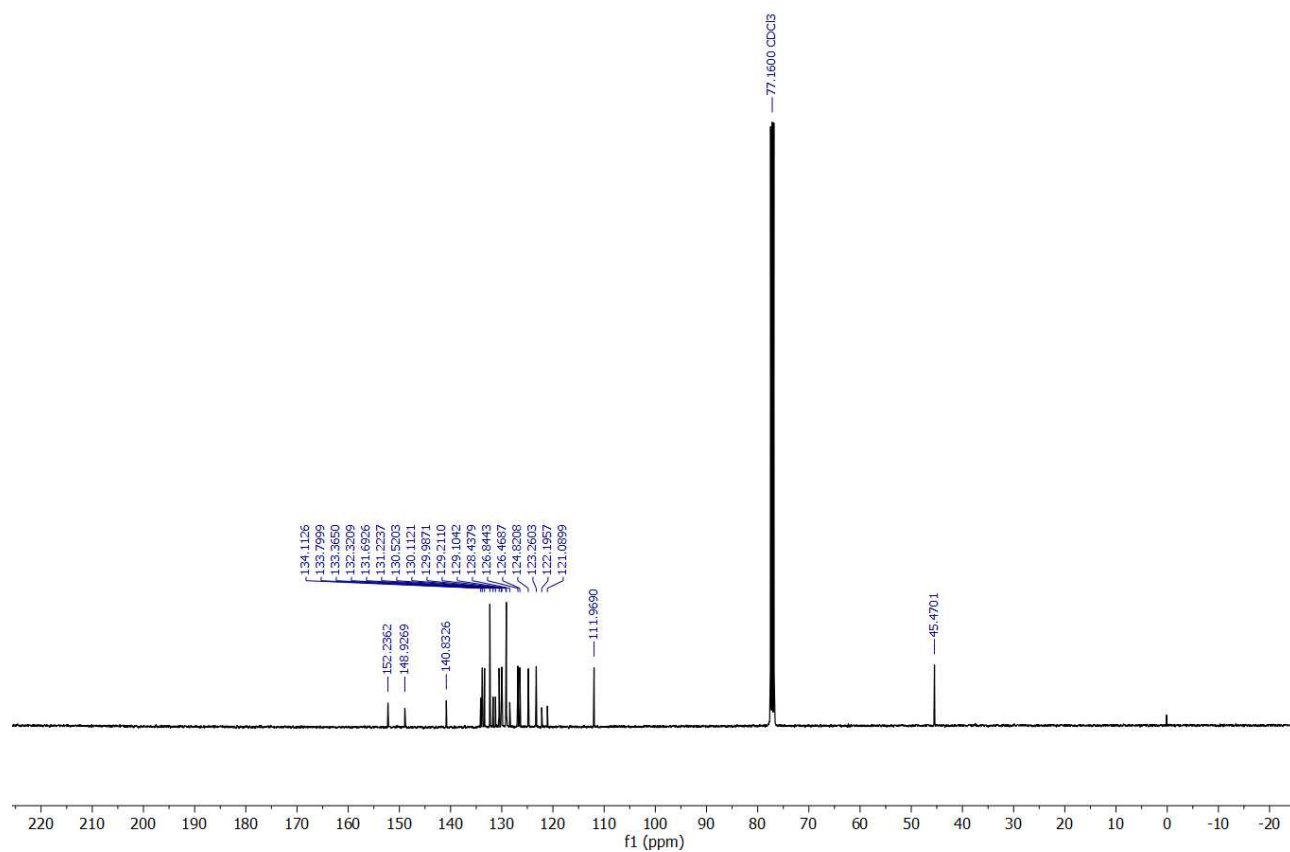

IGDS18\_p

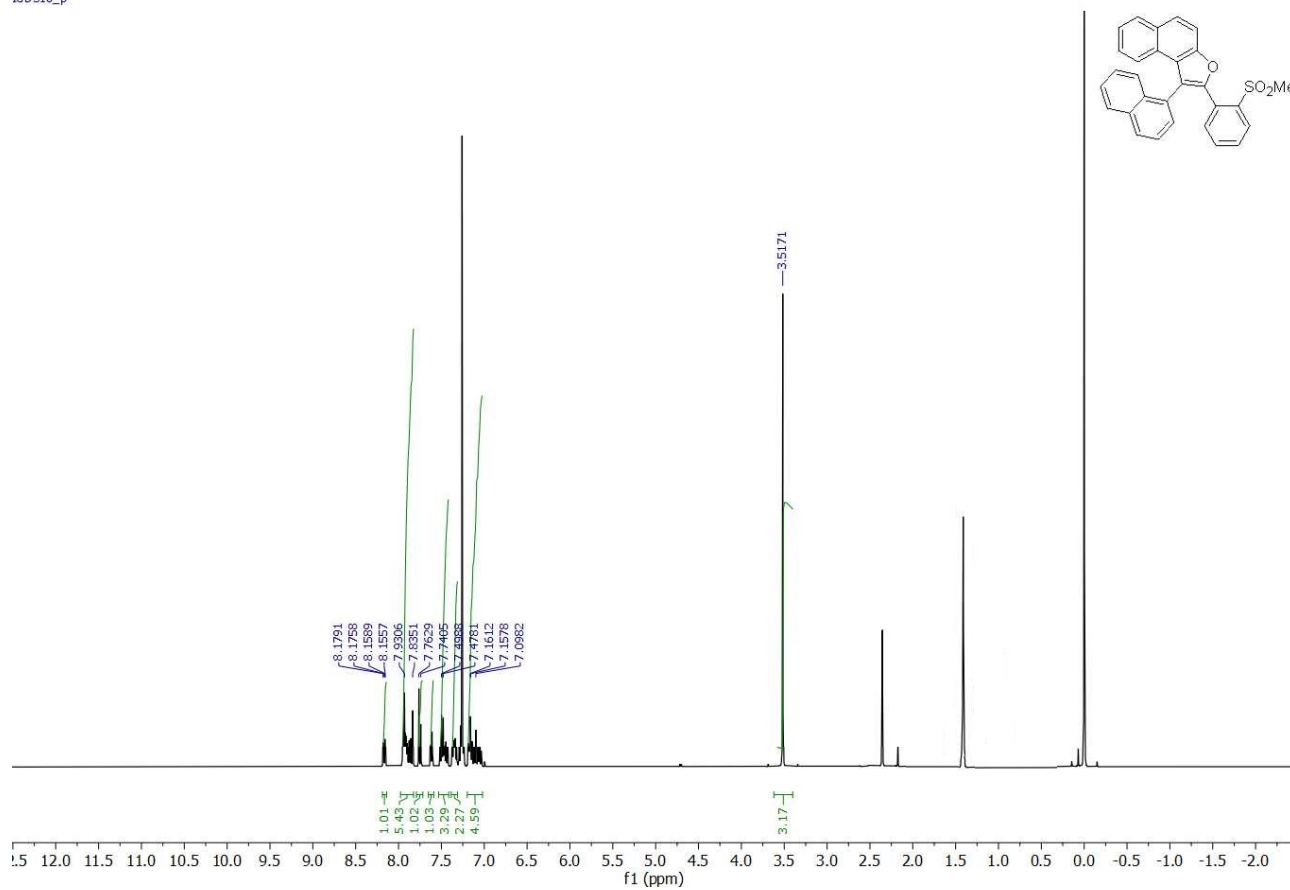

IGDS18\_pulito

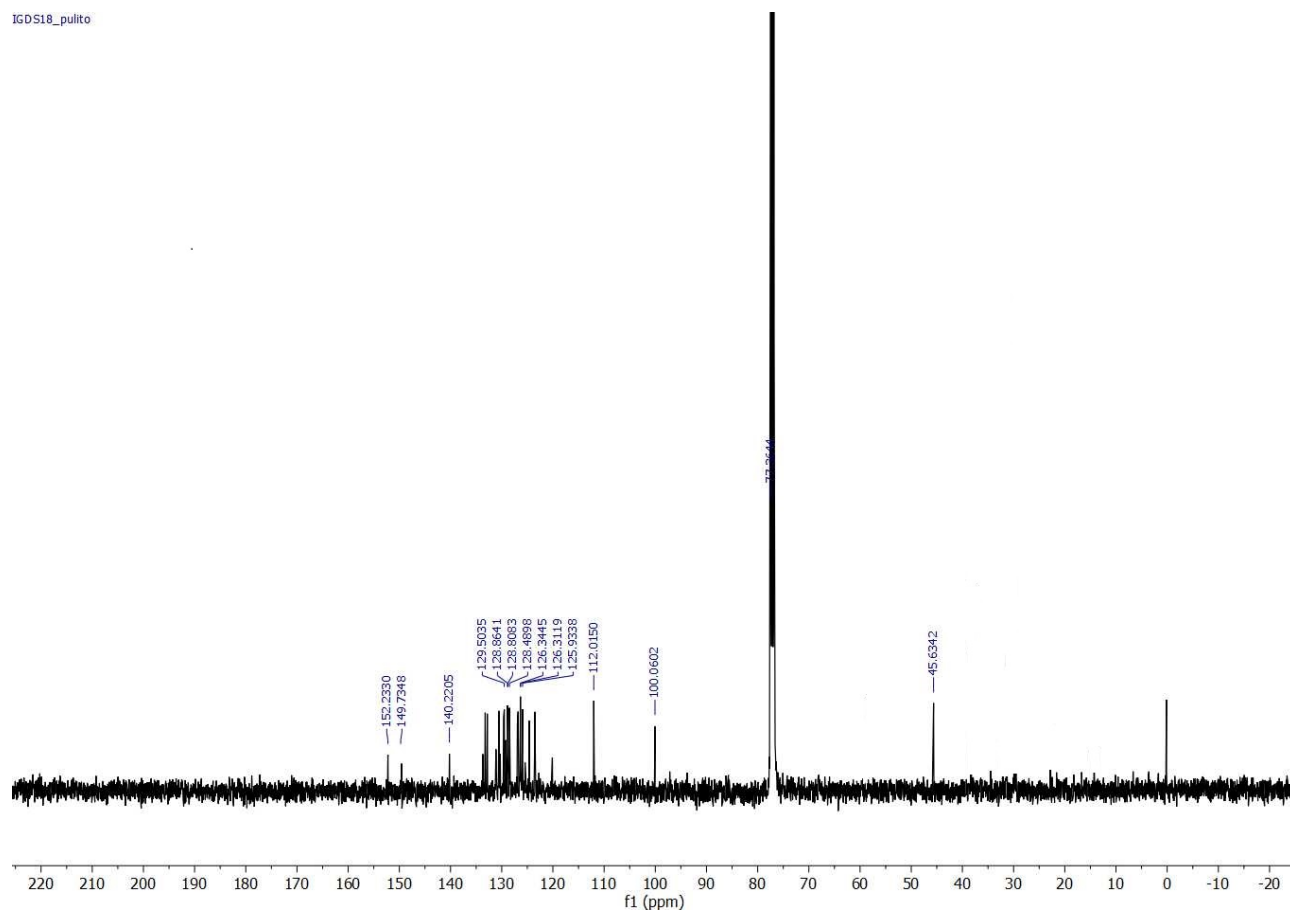

IGDS15\_p

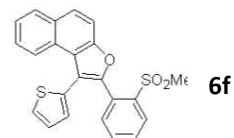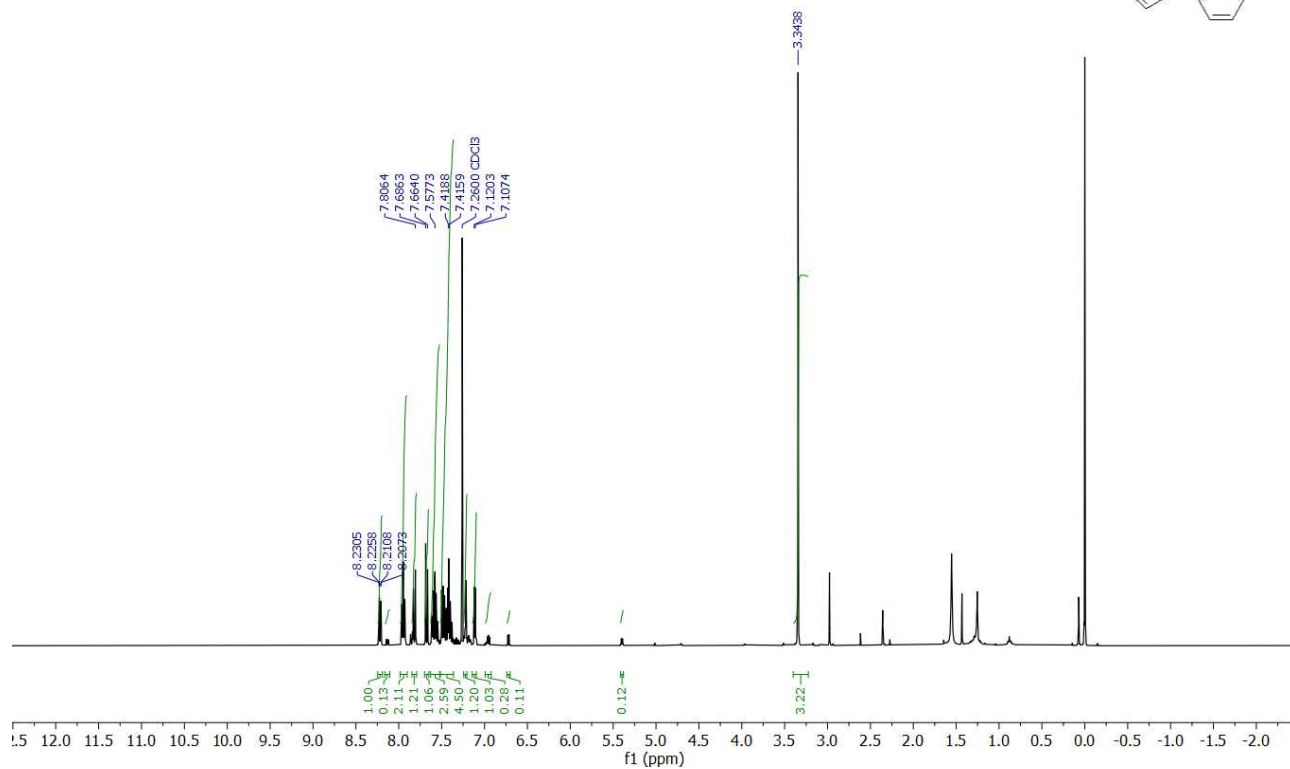

IGDS15

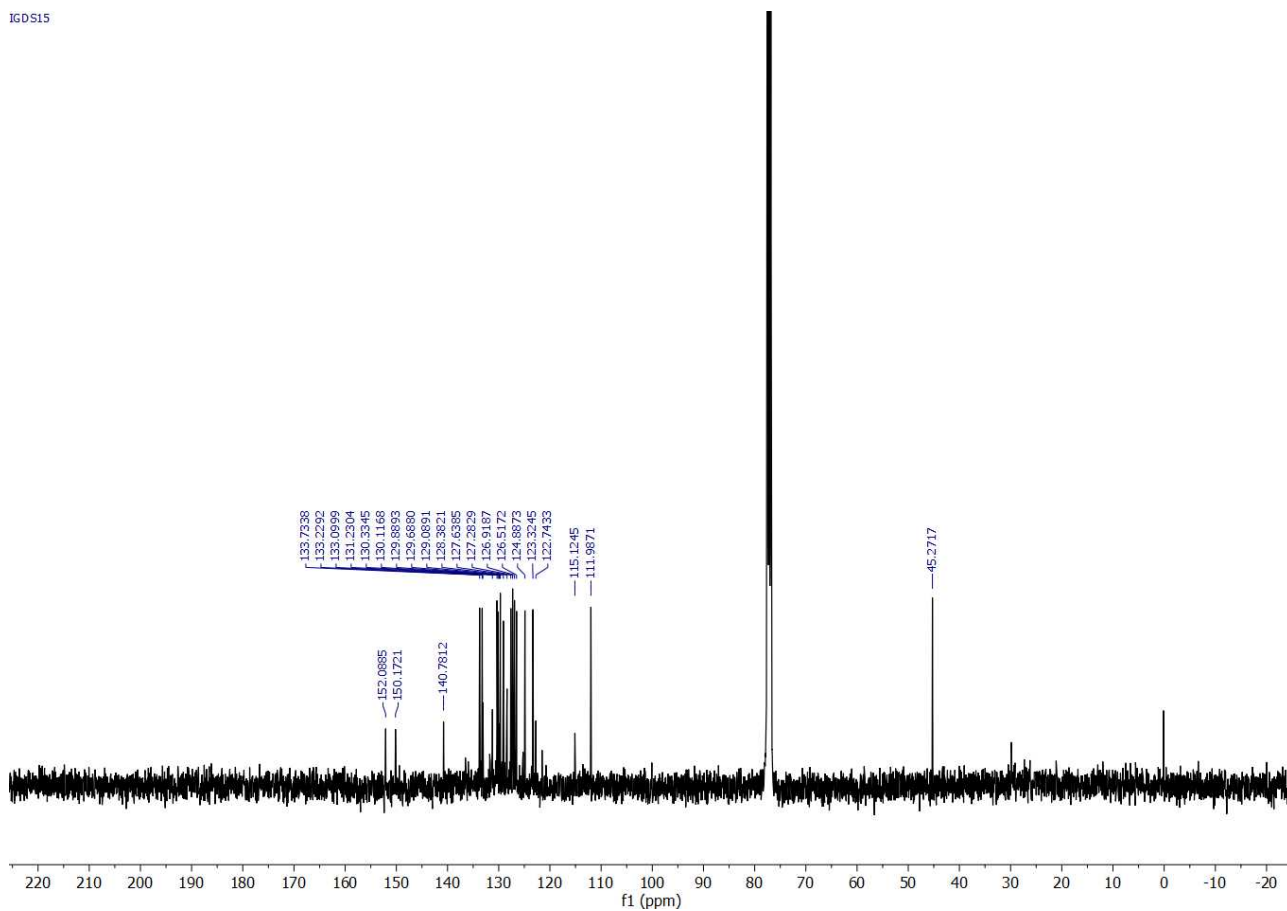

VBNZ70-72\_subs\_aromatizz  
single\_pulse

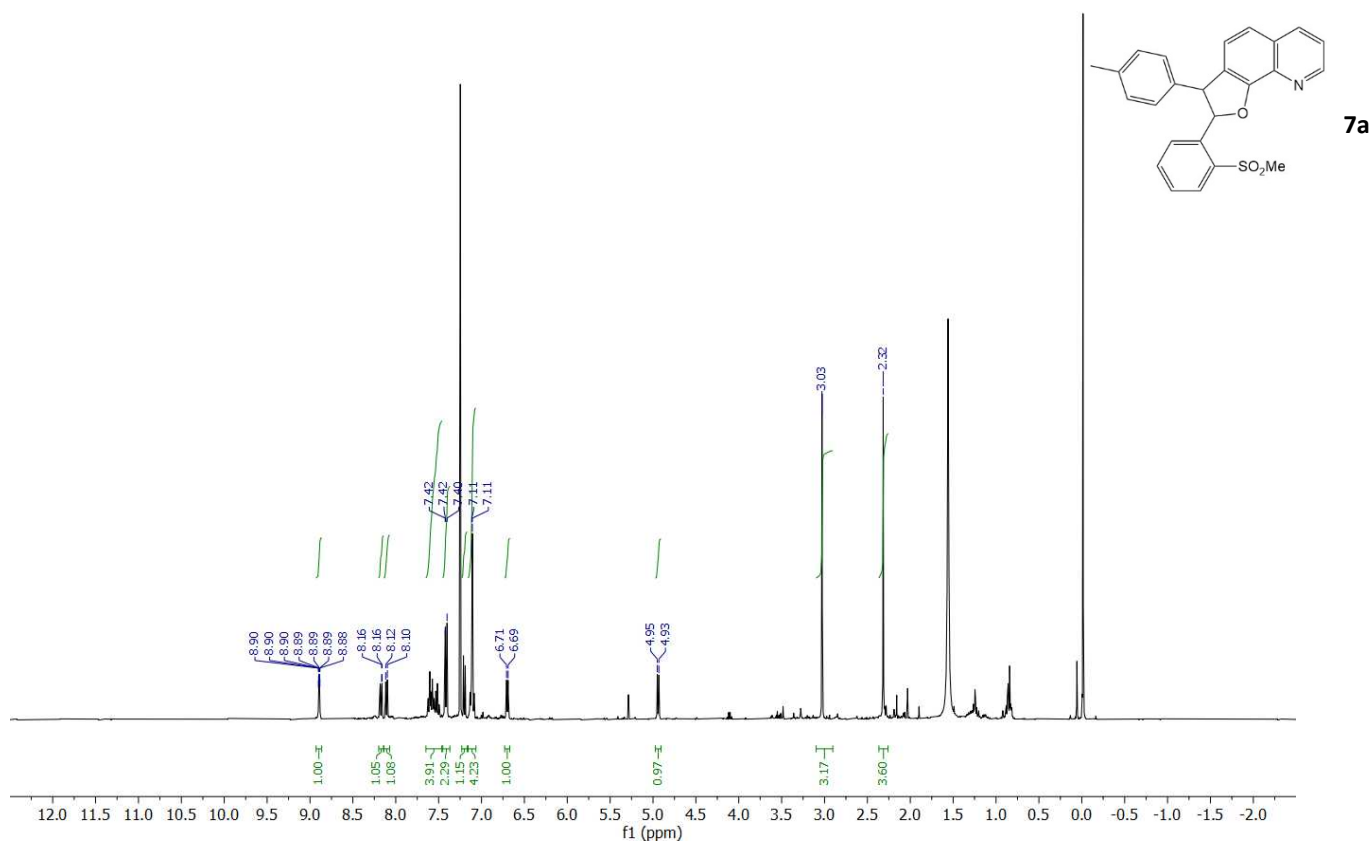

VBNZ70-72\_subs\_aromatizz  
single pulse decoupled gated NOE

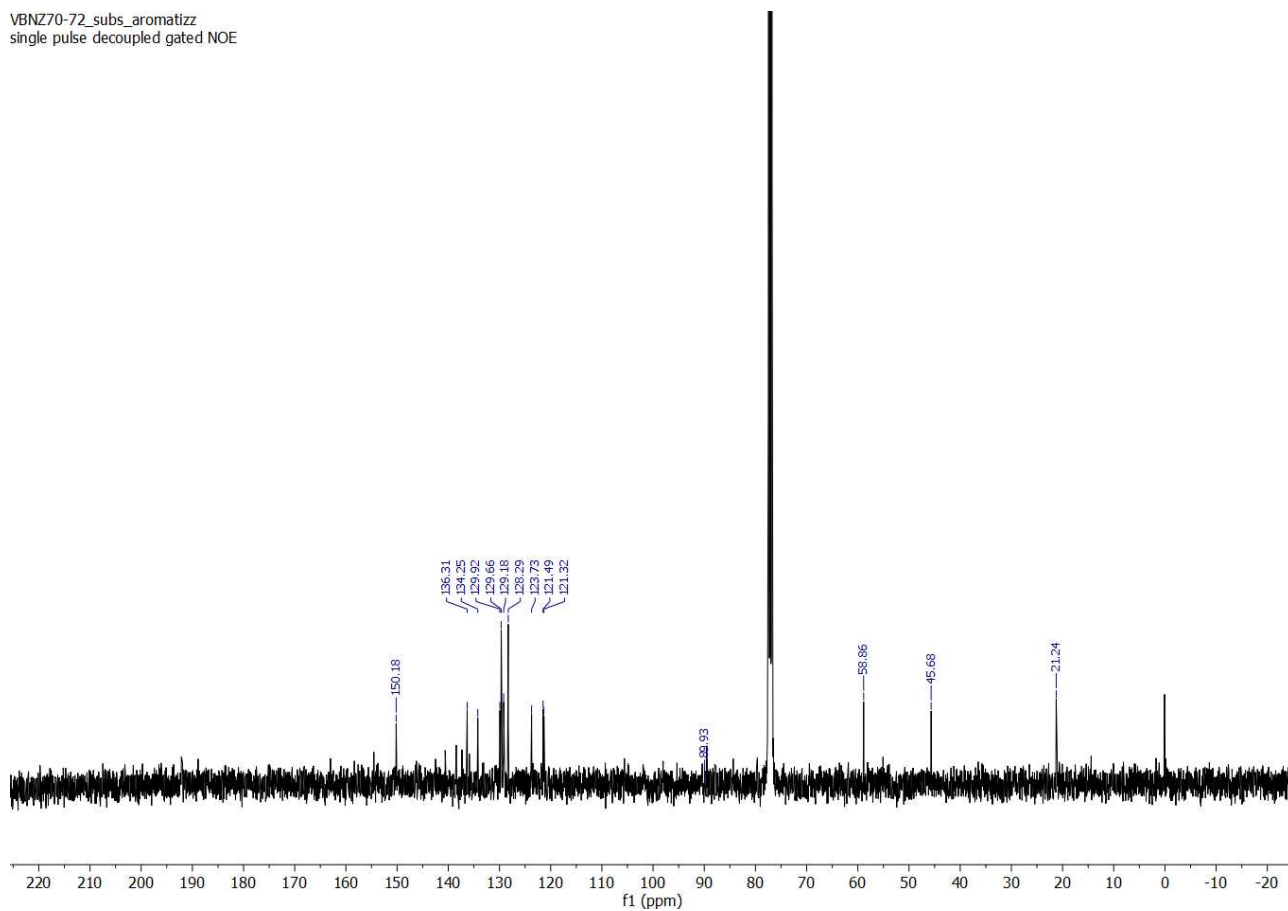

VIBN22\_grezzo  
single\_pulse

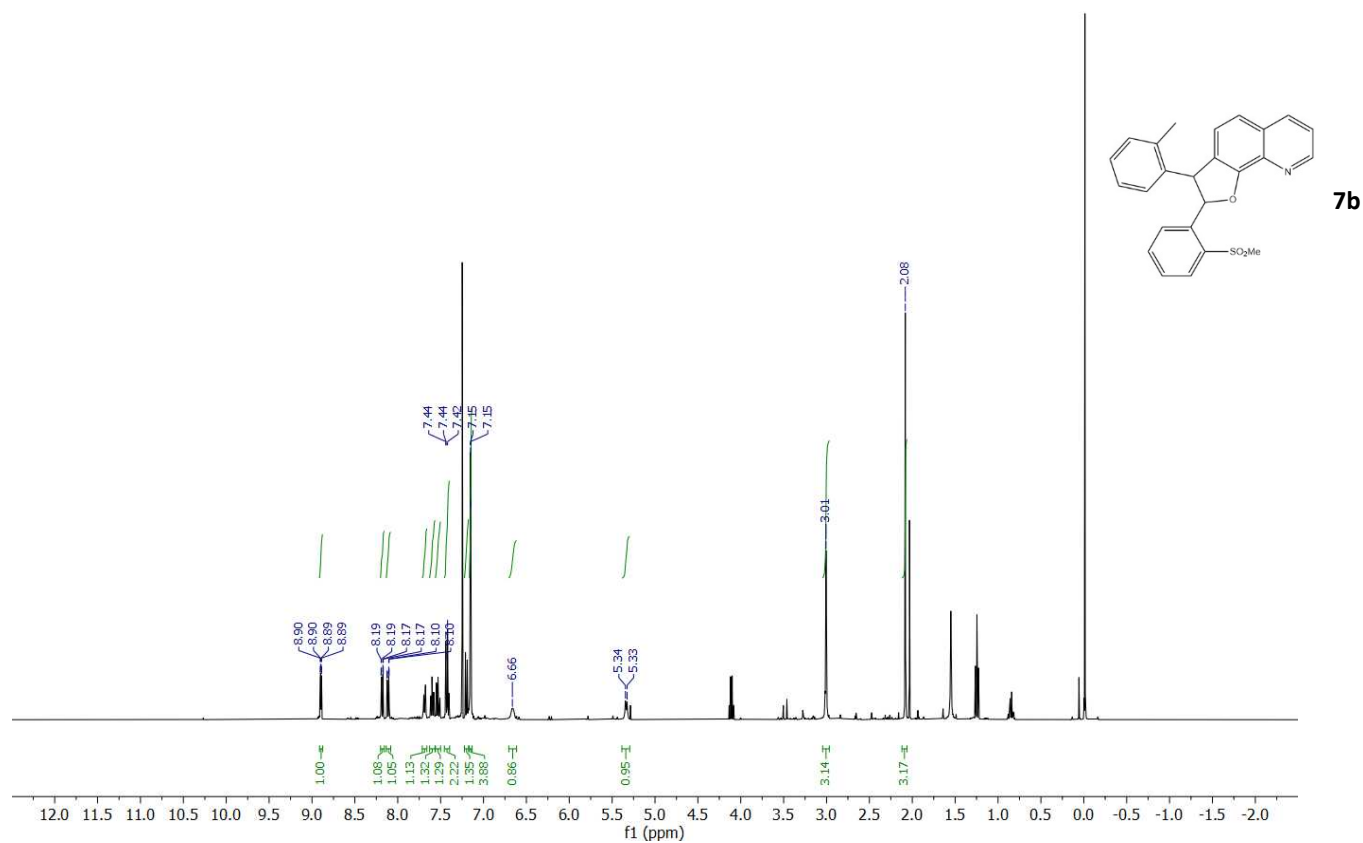

DNF\_o-Tol\_HQ\_ripEP-CM  
single\_pulse decoupled gated NOE

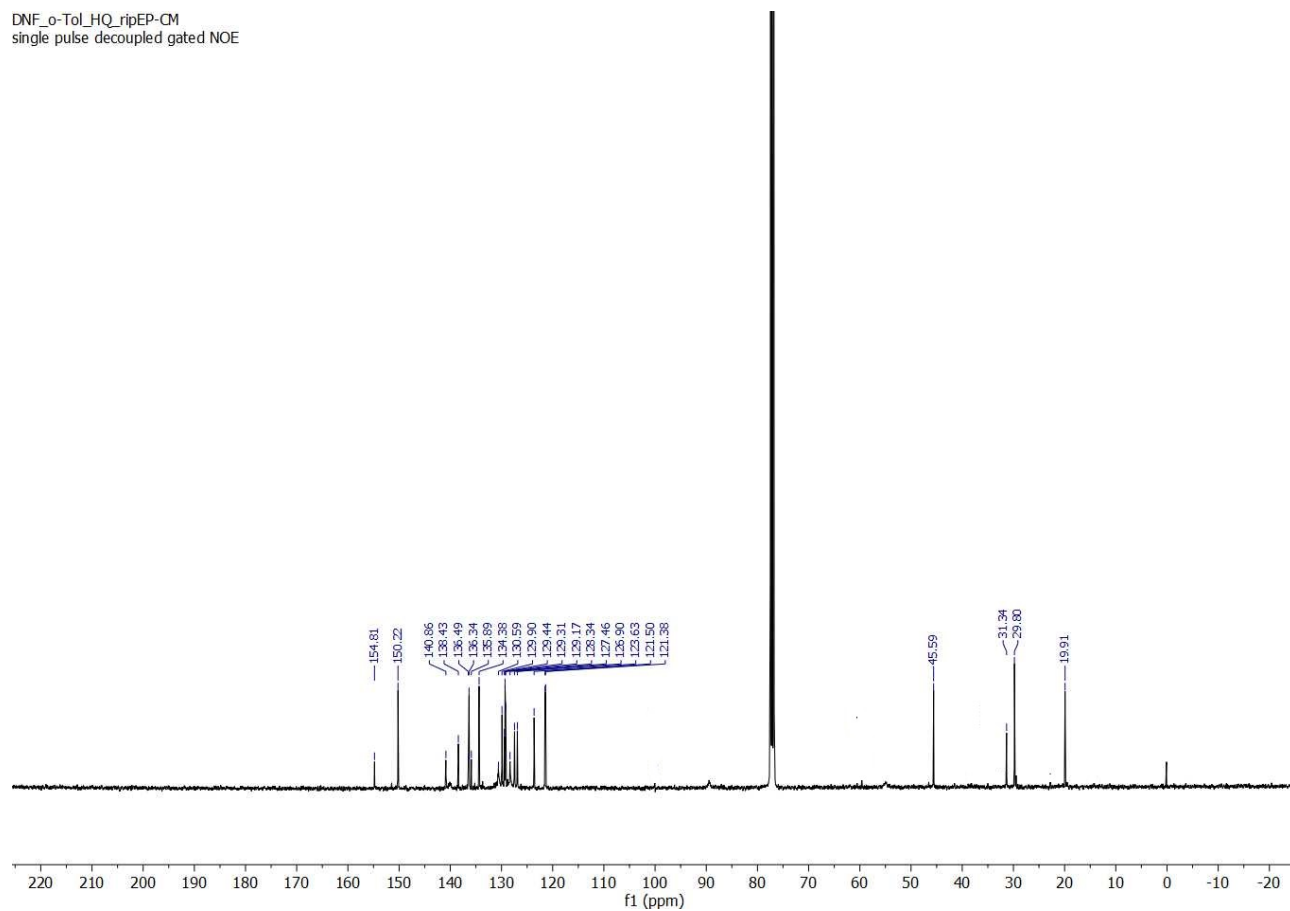

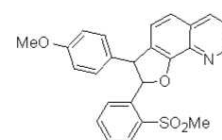

7c

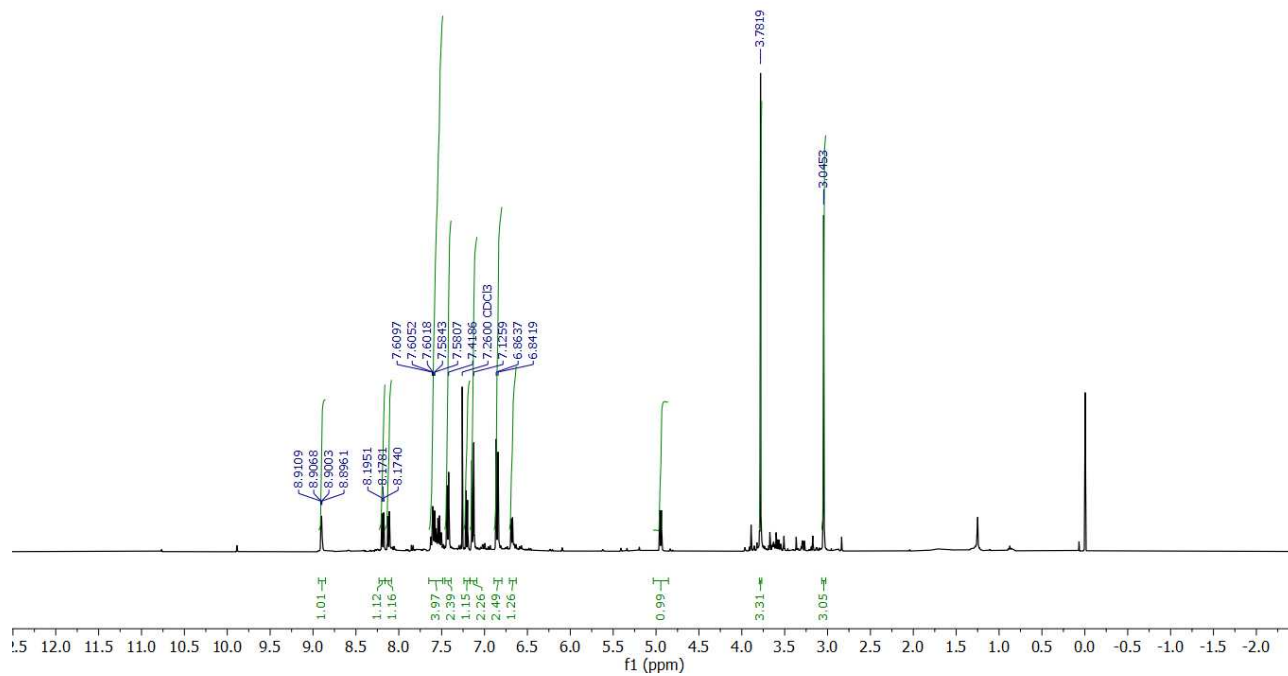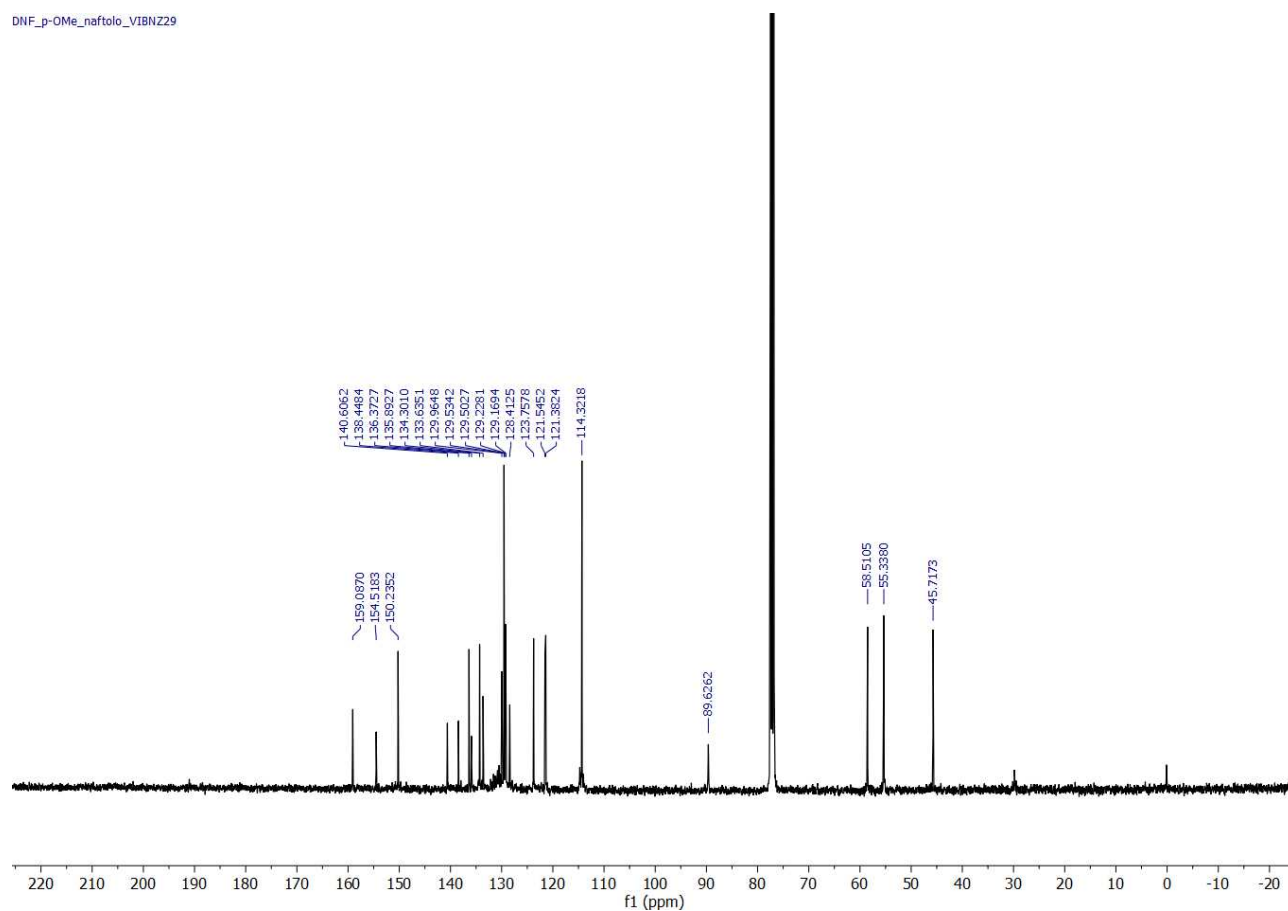

DFQ\_HQ-pCl\_xxEtOH  
single\_pulse

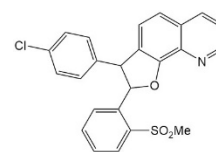

7d

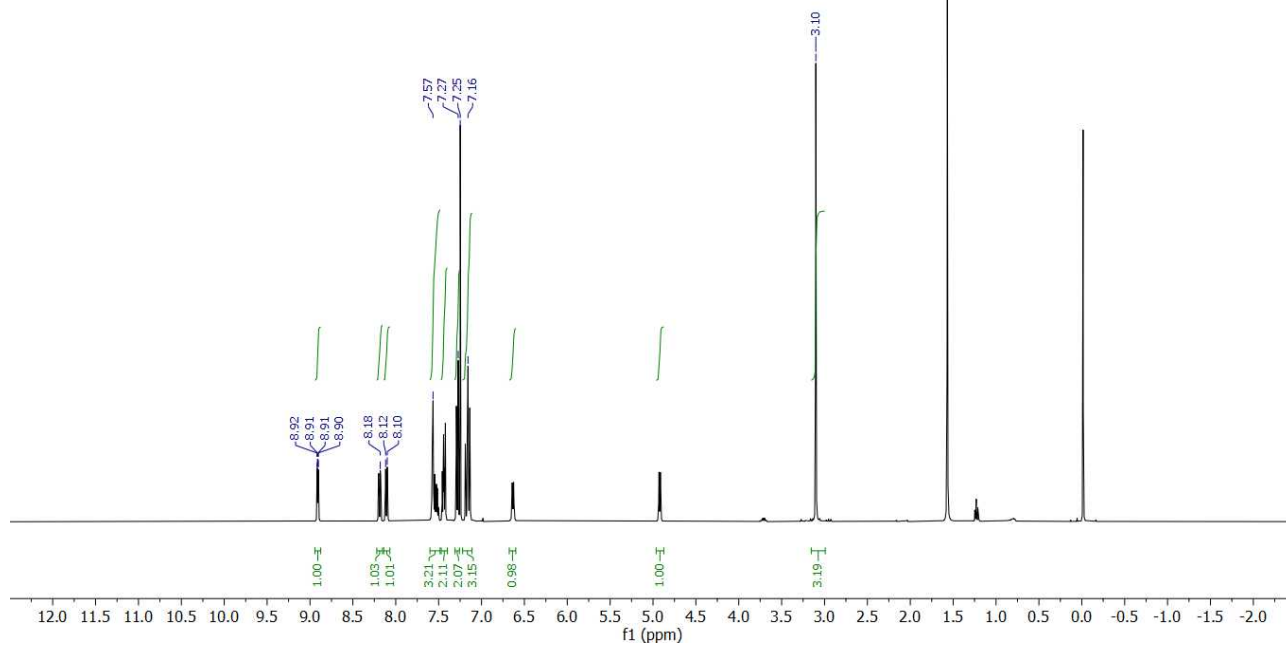

DFQ\_pCl\_HQ  
single\_pulse decoupled gated NOE

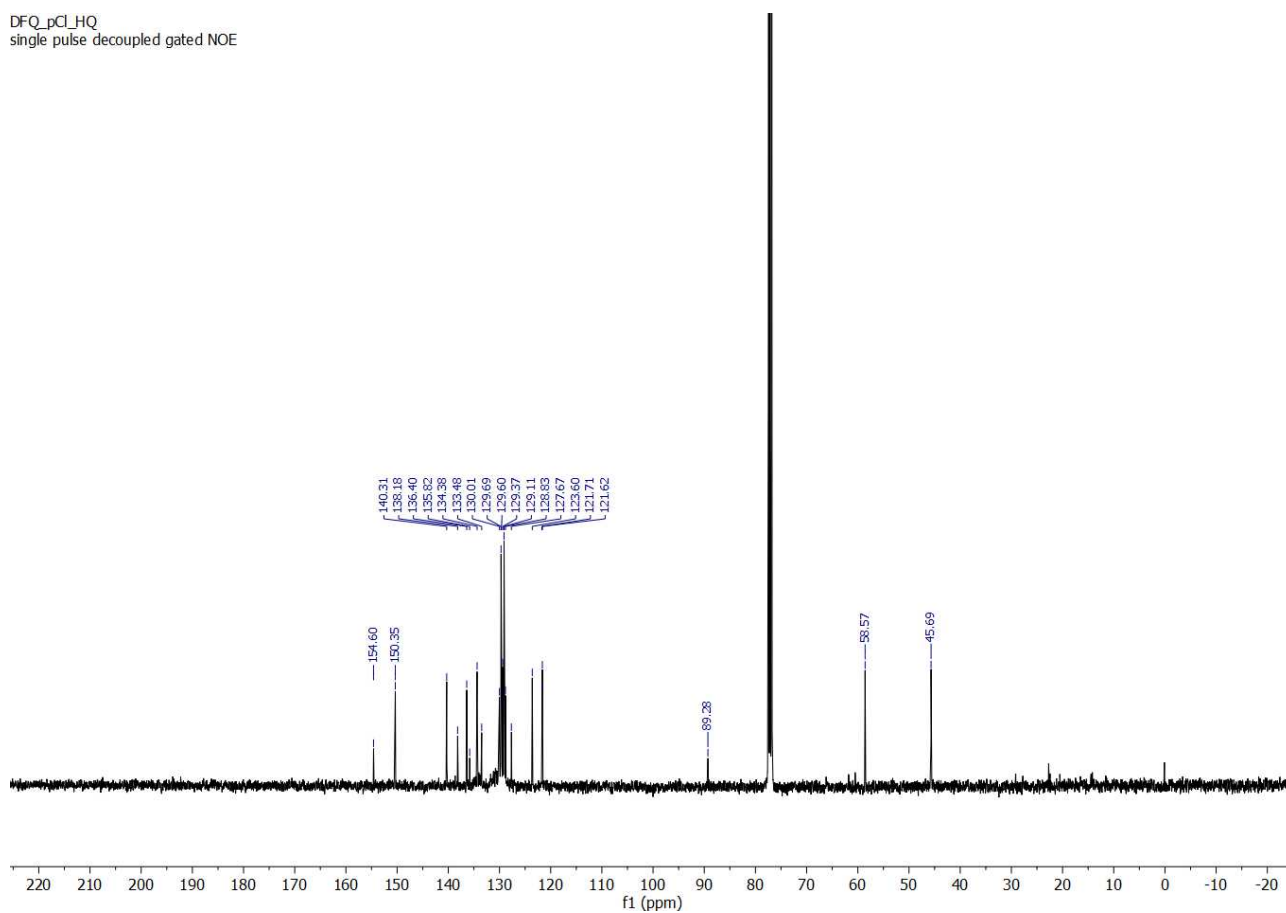

NF\_ptol\_HQ\_VIBN227

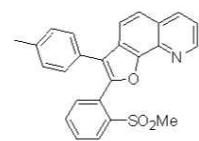

8a

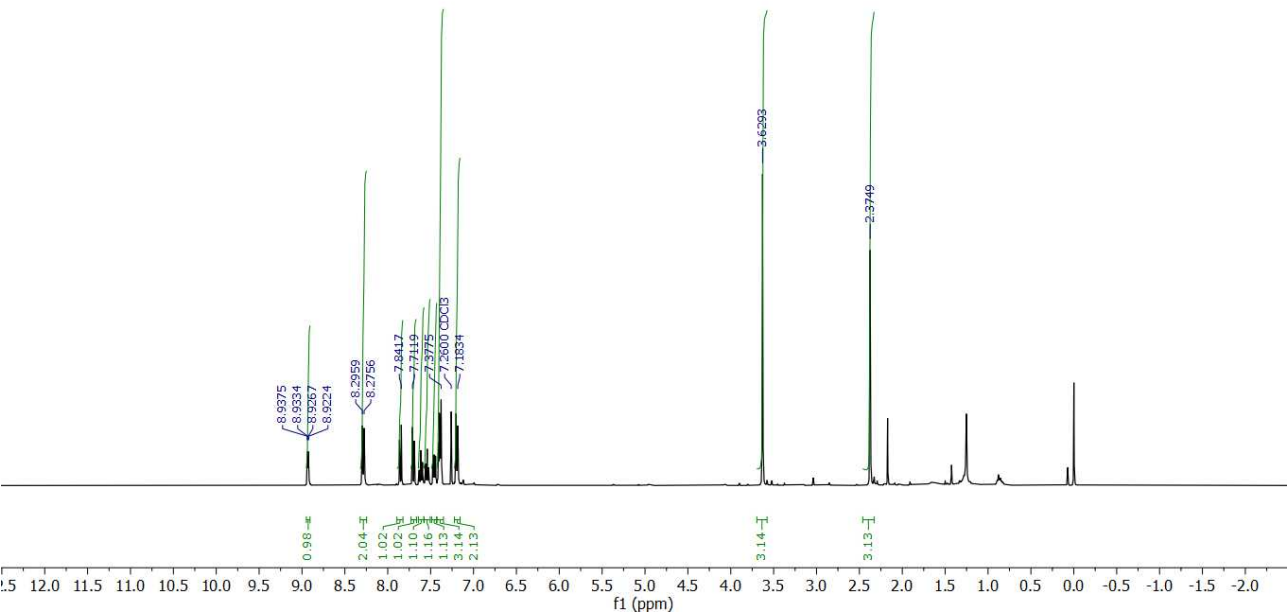

NF\_ptol\_HQ\_VIBN227

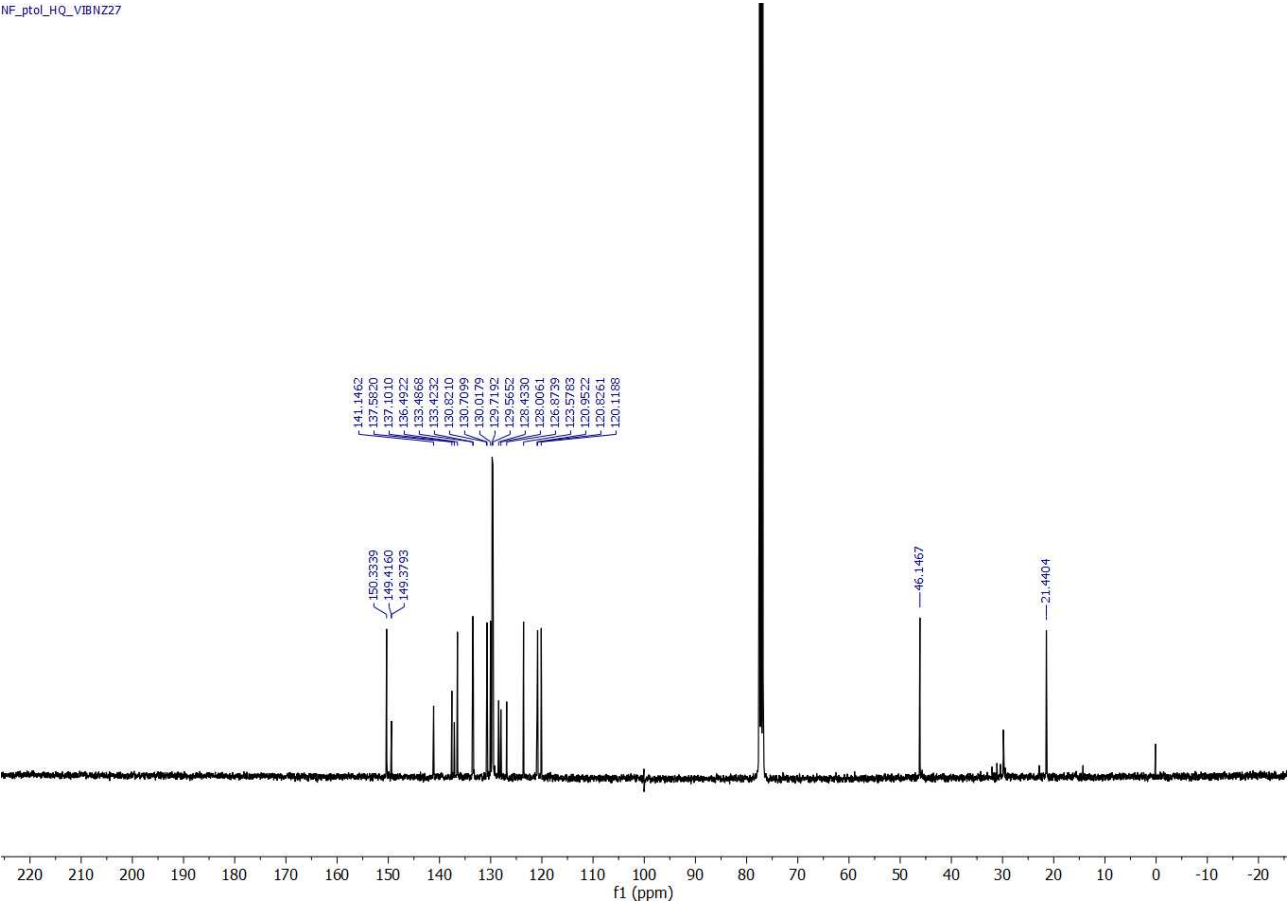



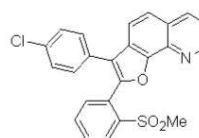

8d

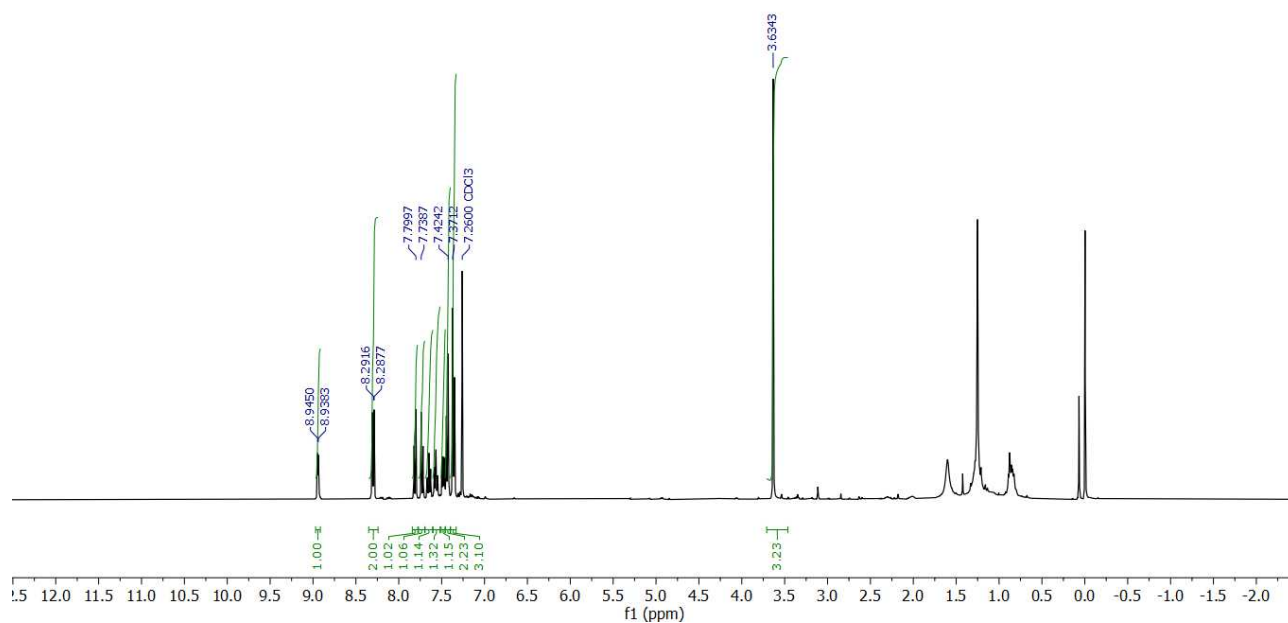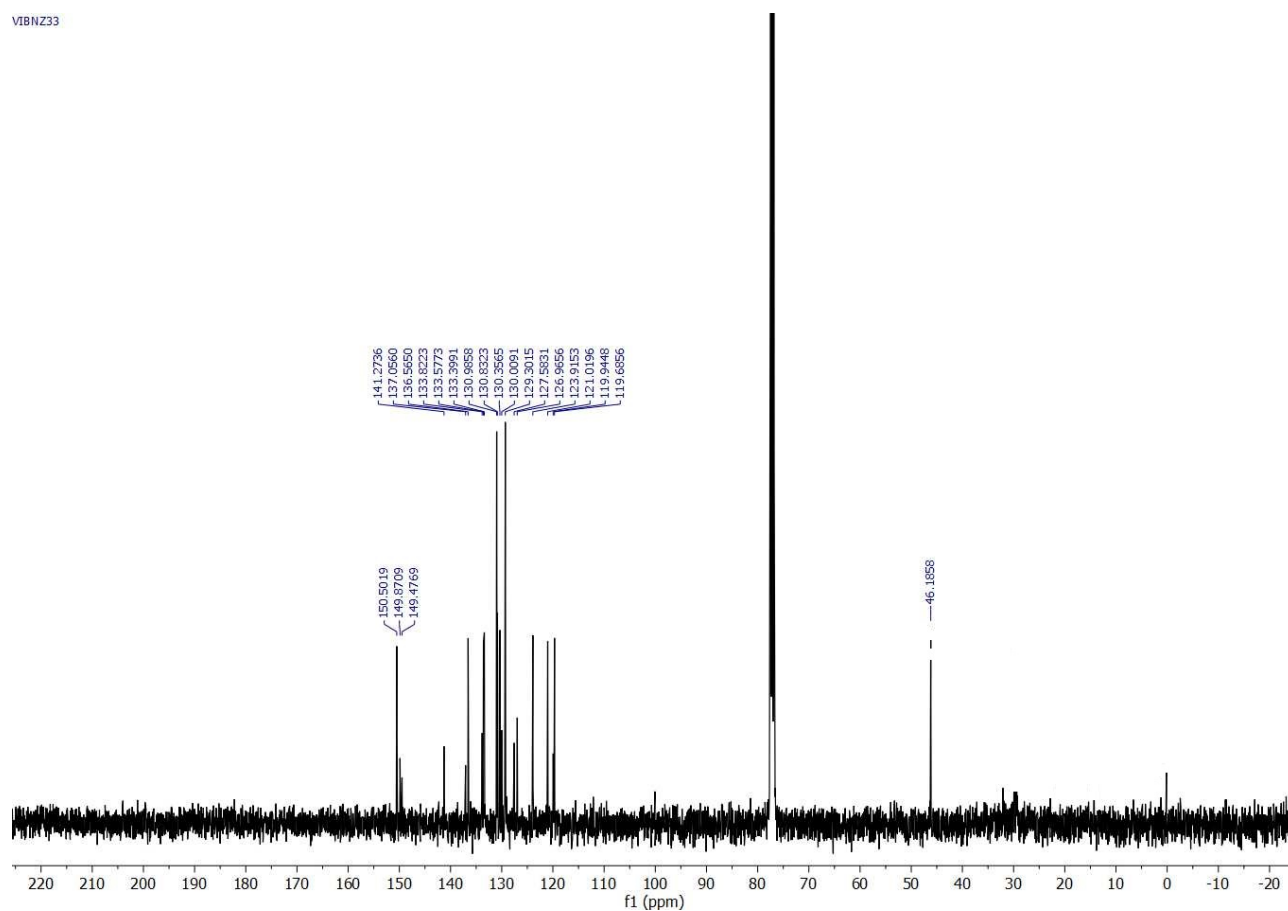

VBZ80\_hydroxycoumarin  
single\_pulse

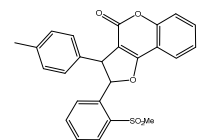

9a

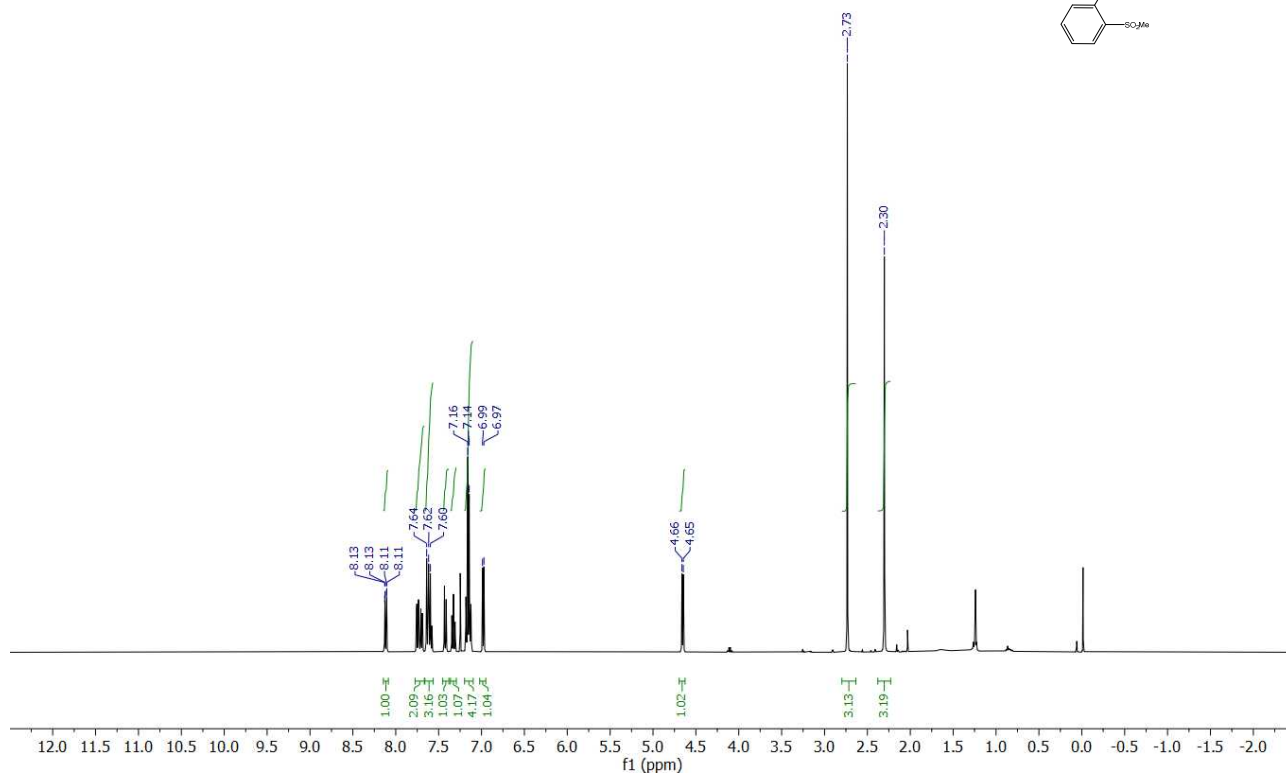

VBZ80\_hydroxycoumarin  
single pulse decoupled gated NOE

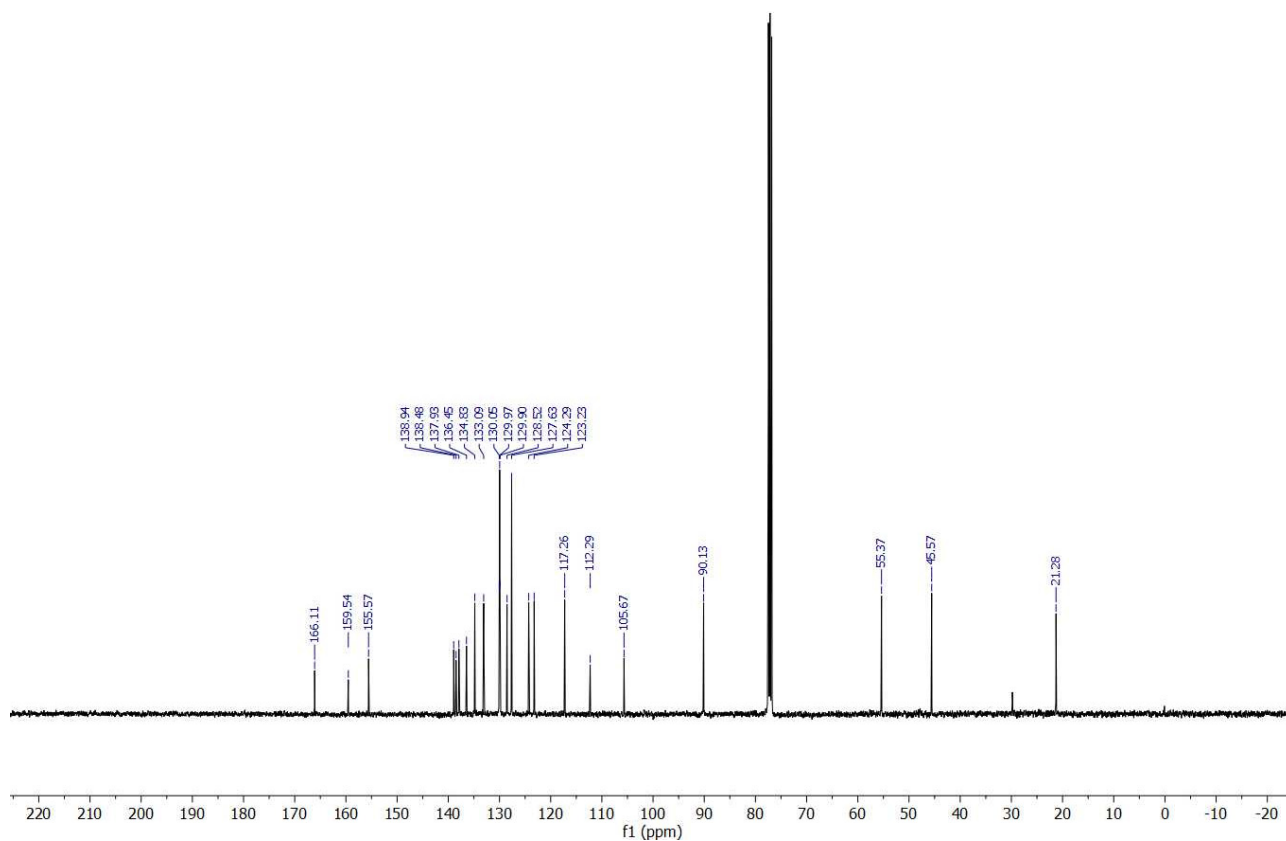

IGDS11\_Elettrocidiol\_p-tol

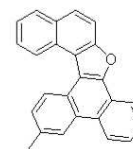

11a

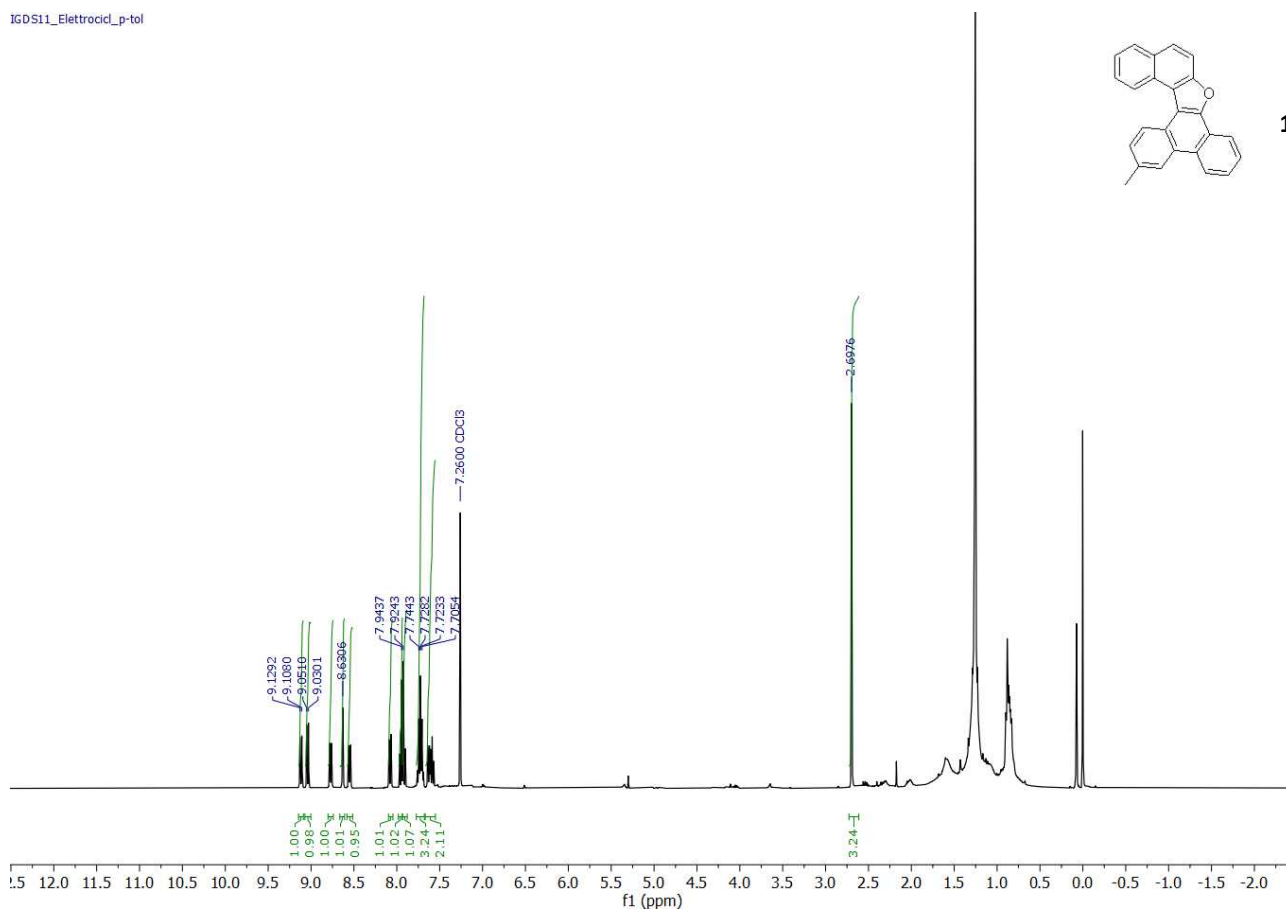

IGDS11\_Elettrocidiol\_p-tol

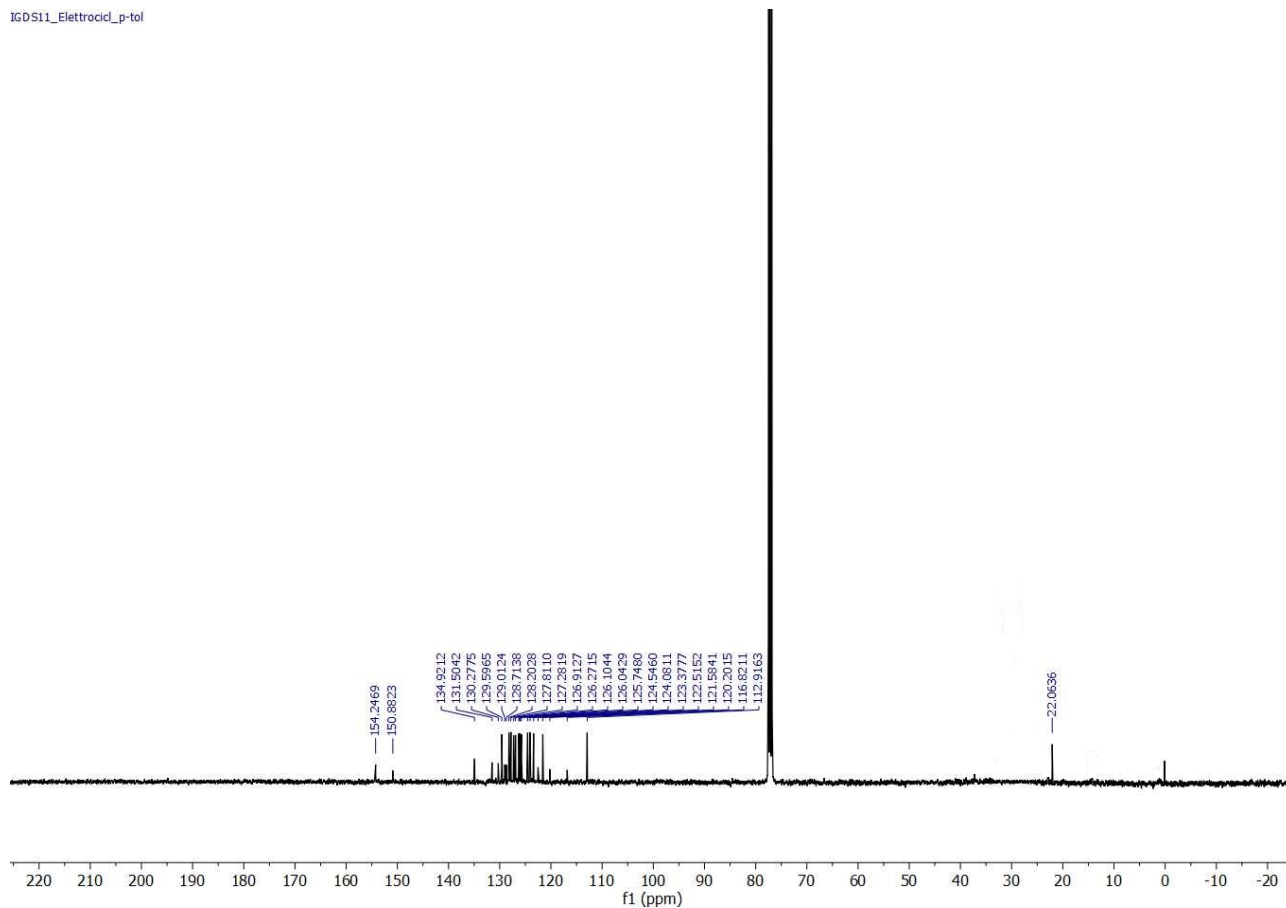

IGDS20\_fr3,4-5

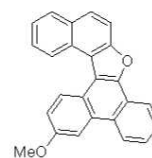

11c

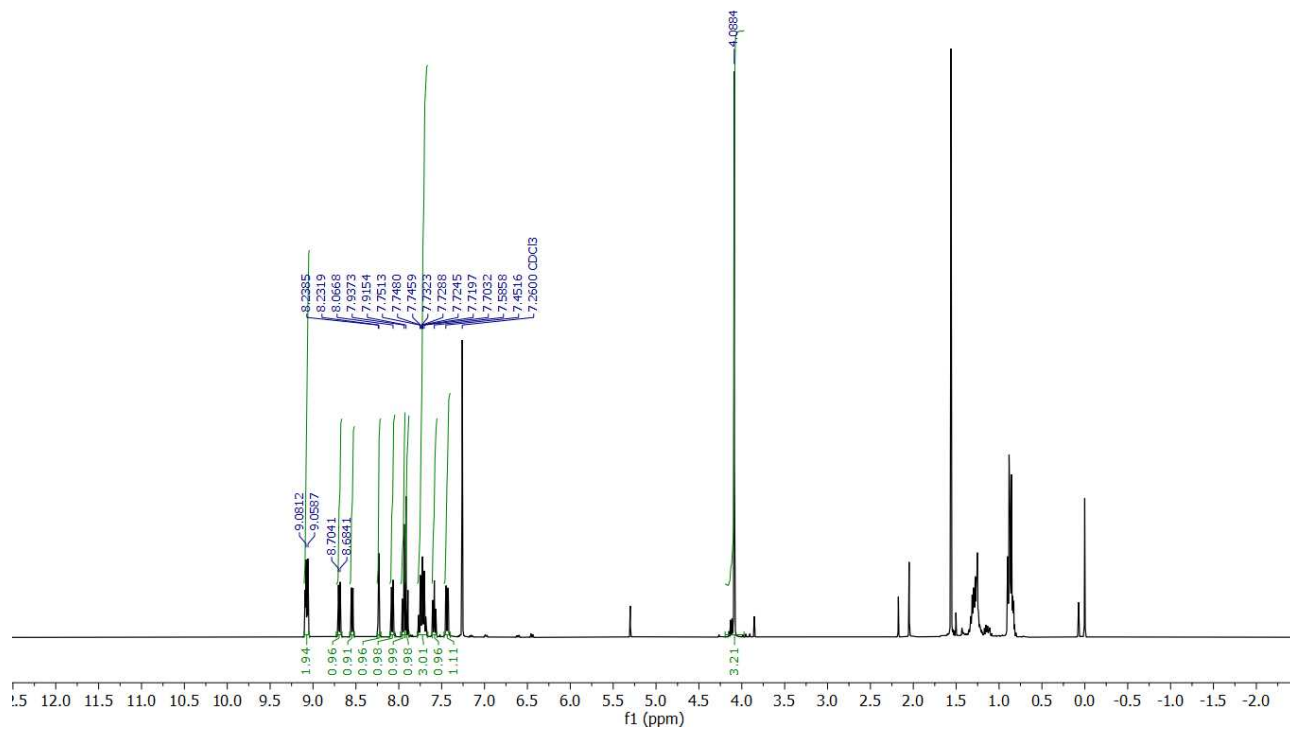

IGDS20\_fr3,4-5

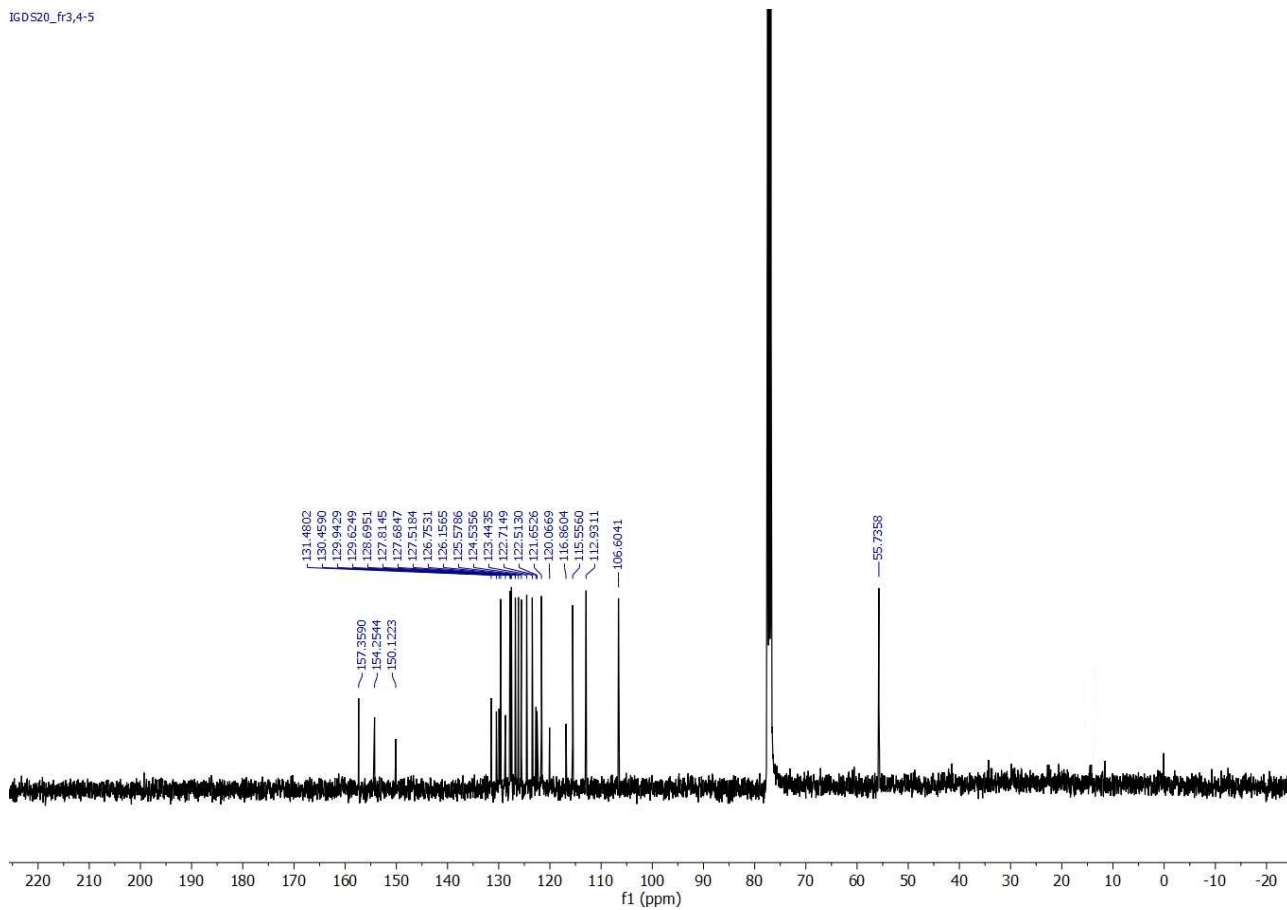

IGDS\_pCl\_pulito  
single\_pulse

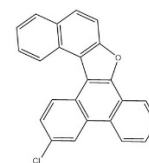

11d

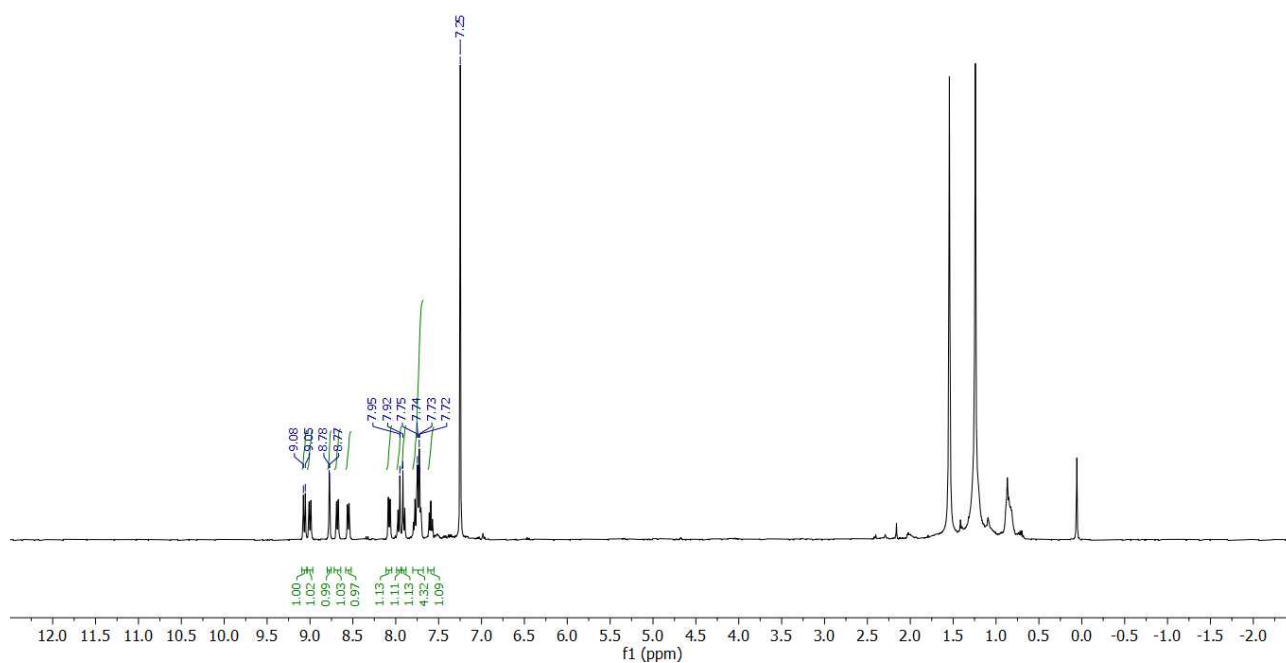

IGDS\_p-Cl\_elettrociclizzato\_concentrato  
single pulse decoupled gated NOE

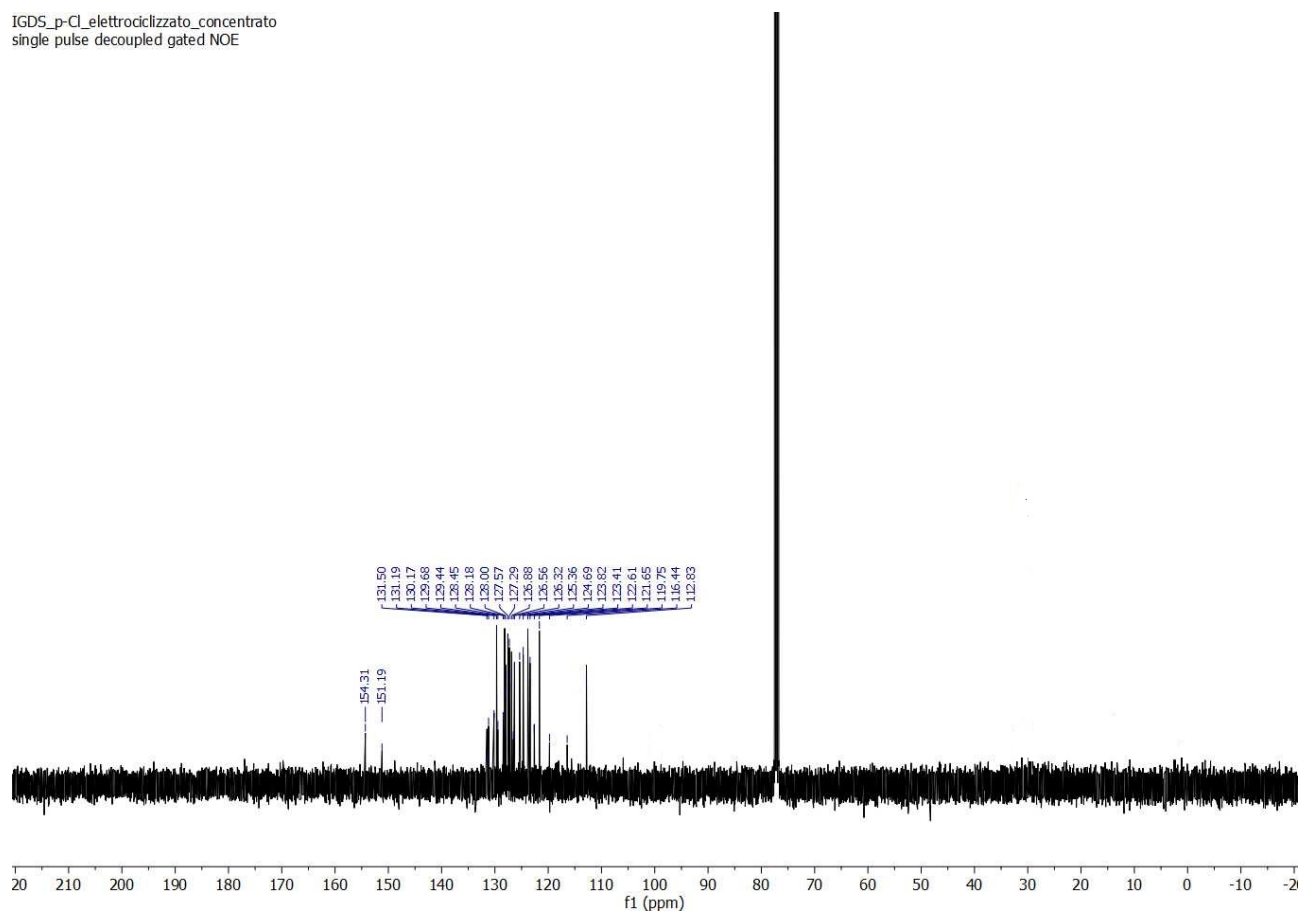

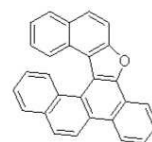

11e

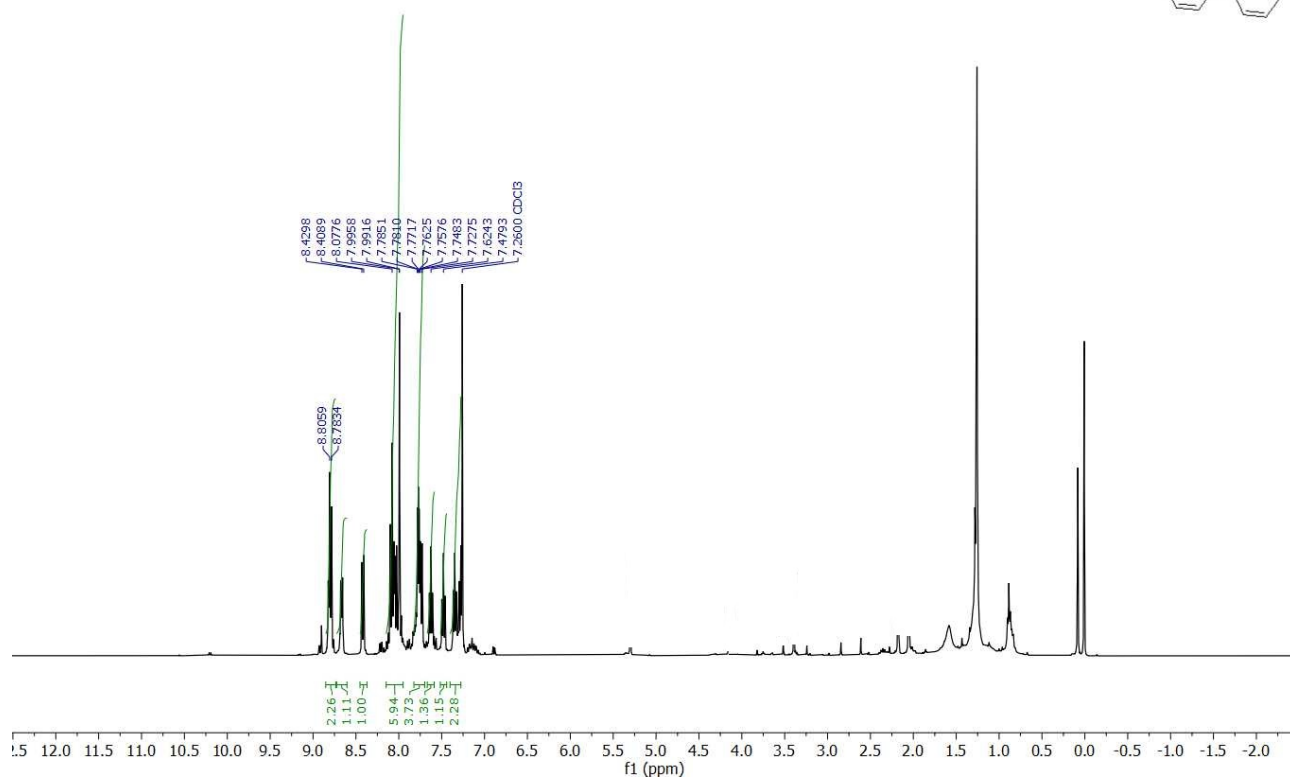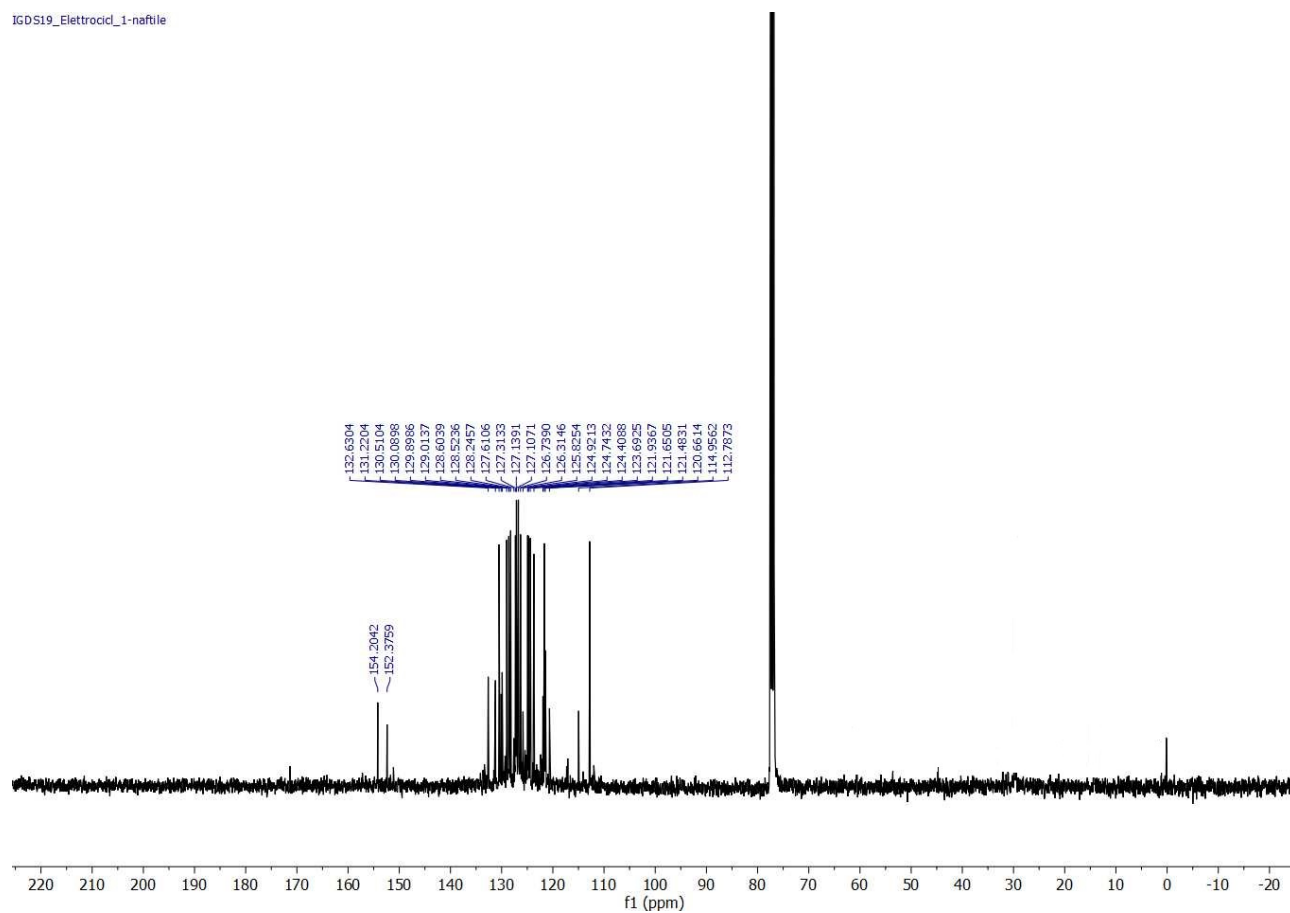

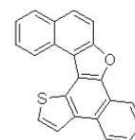**11f**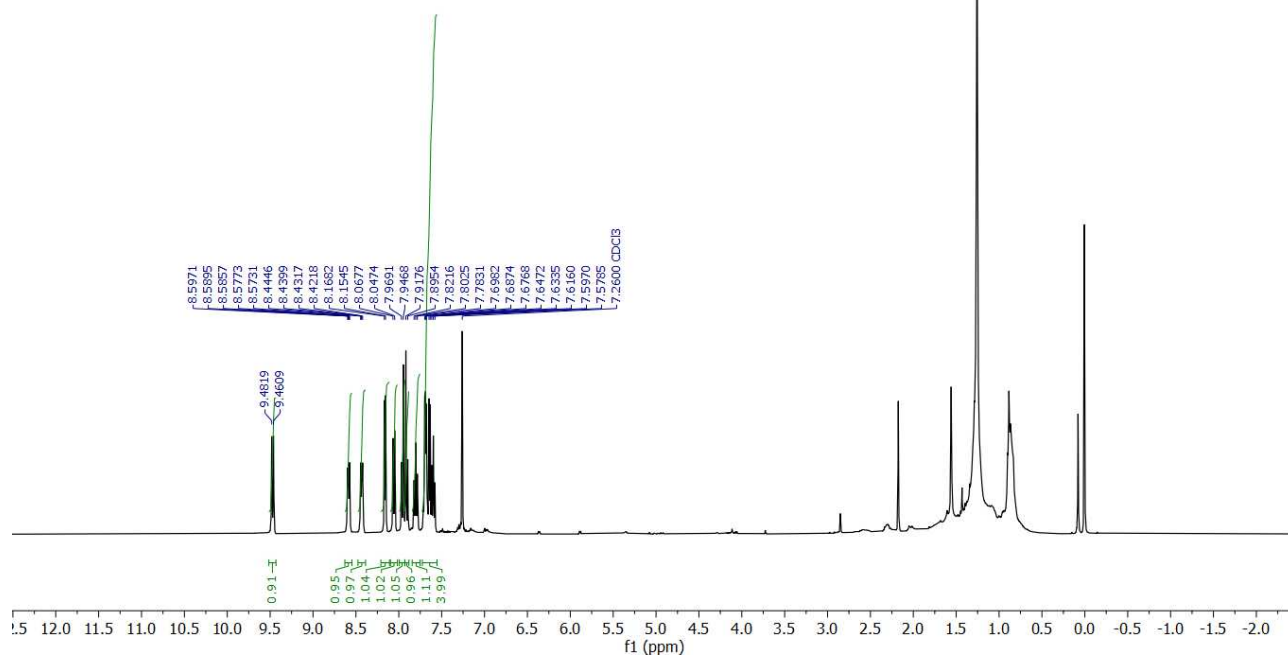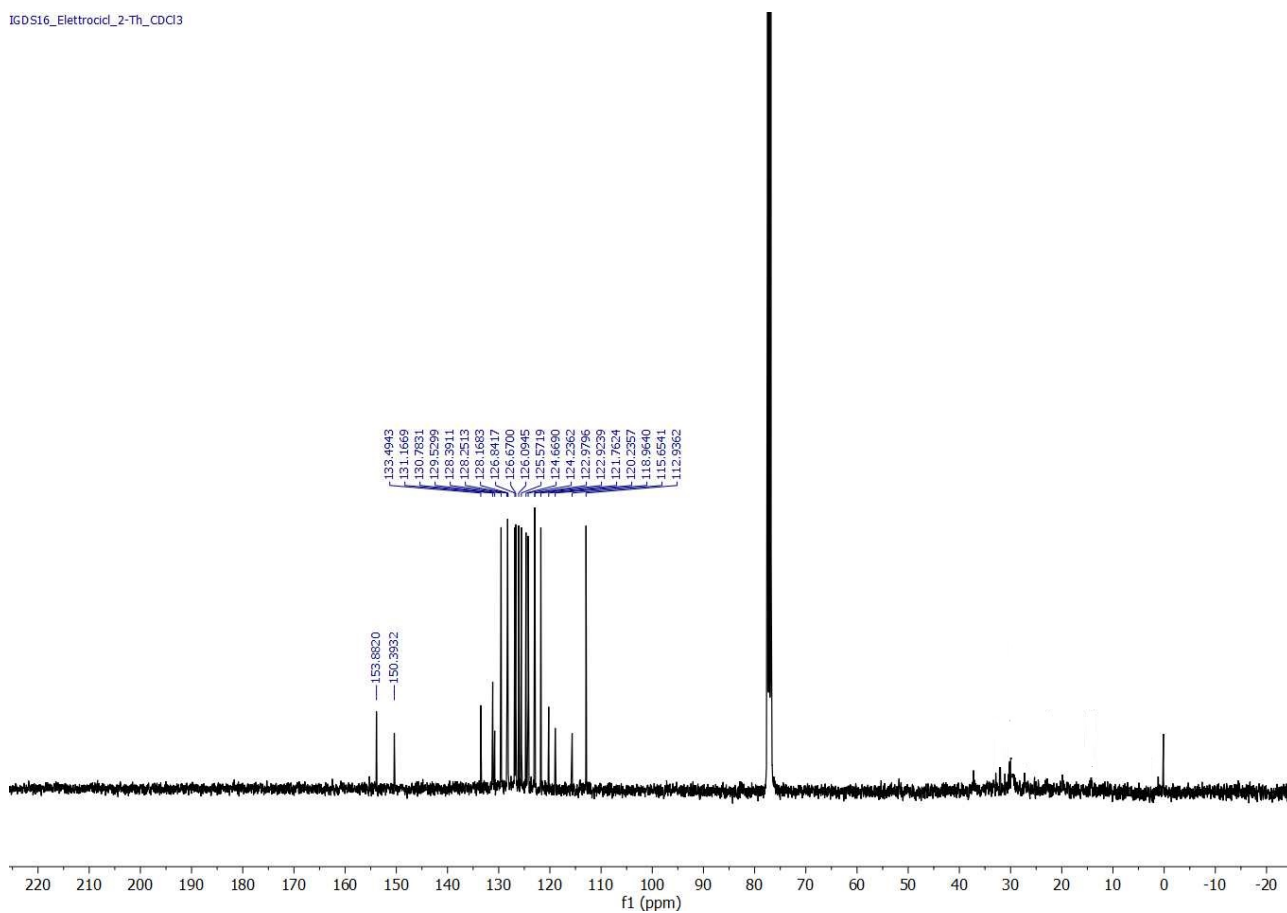

IGDS28\_2-6\_xxEtOH\_DMSO  
single\_pulse

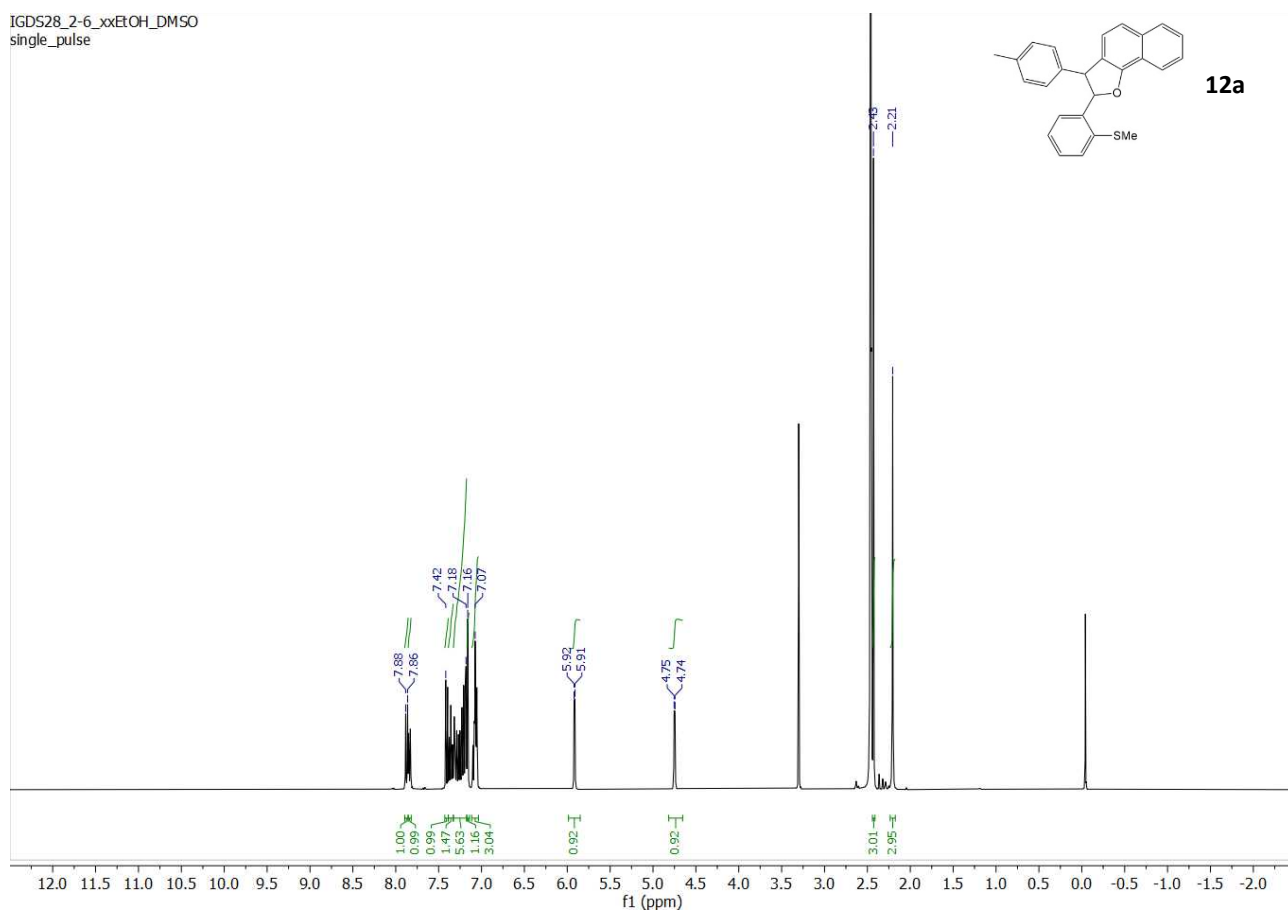

IGDS28\_2-6\_xxEtOH\_DMSO  
single\_pulse decoupled gated NOE

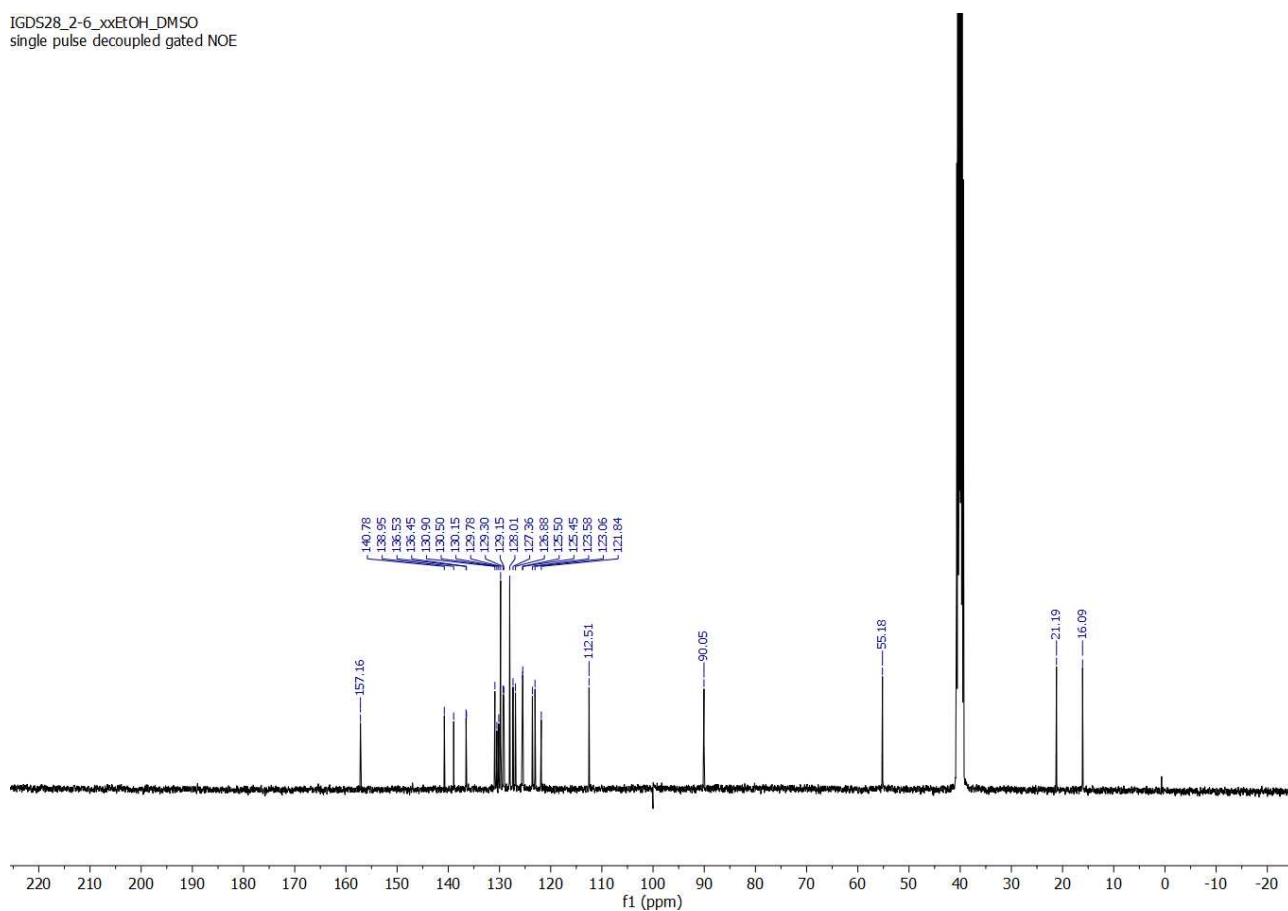



IISAS4  
single\_pulse

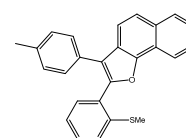

13a

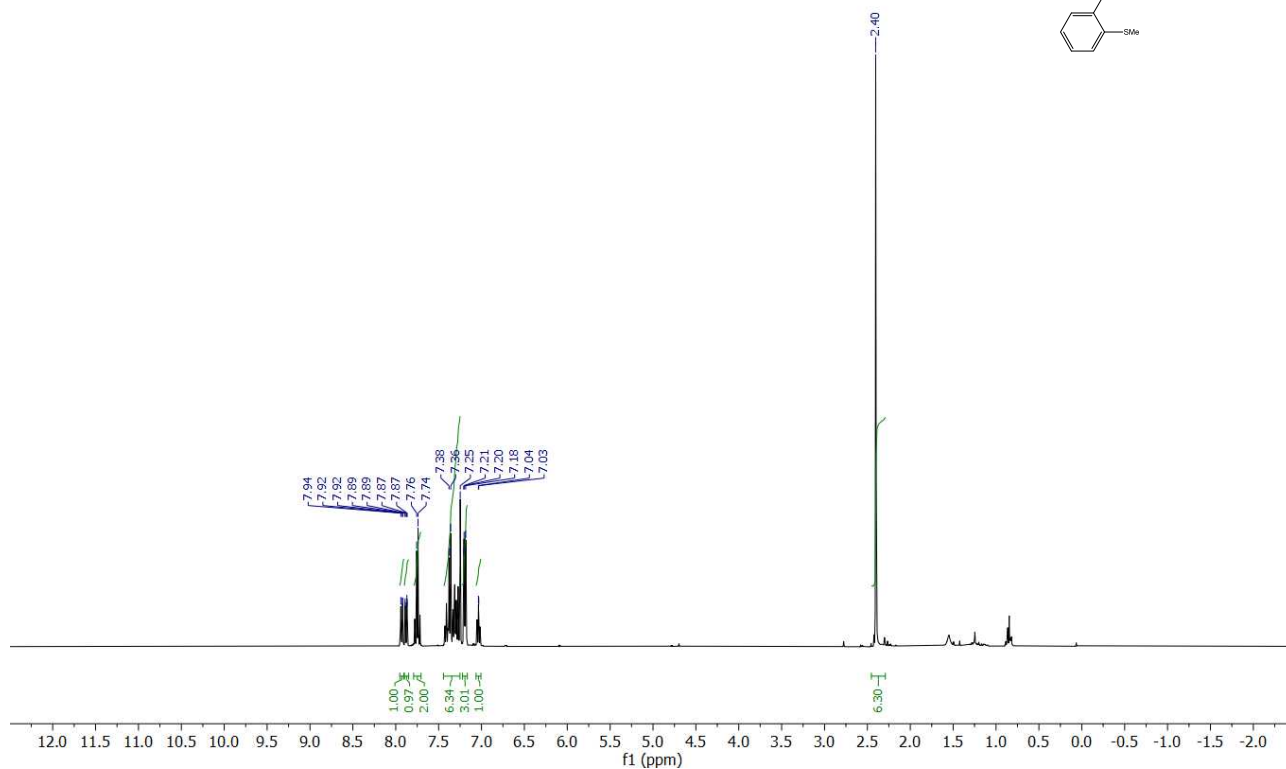

IISAS4

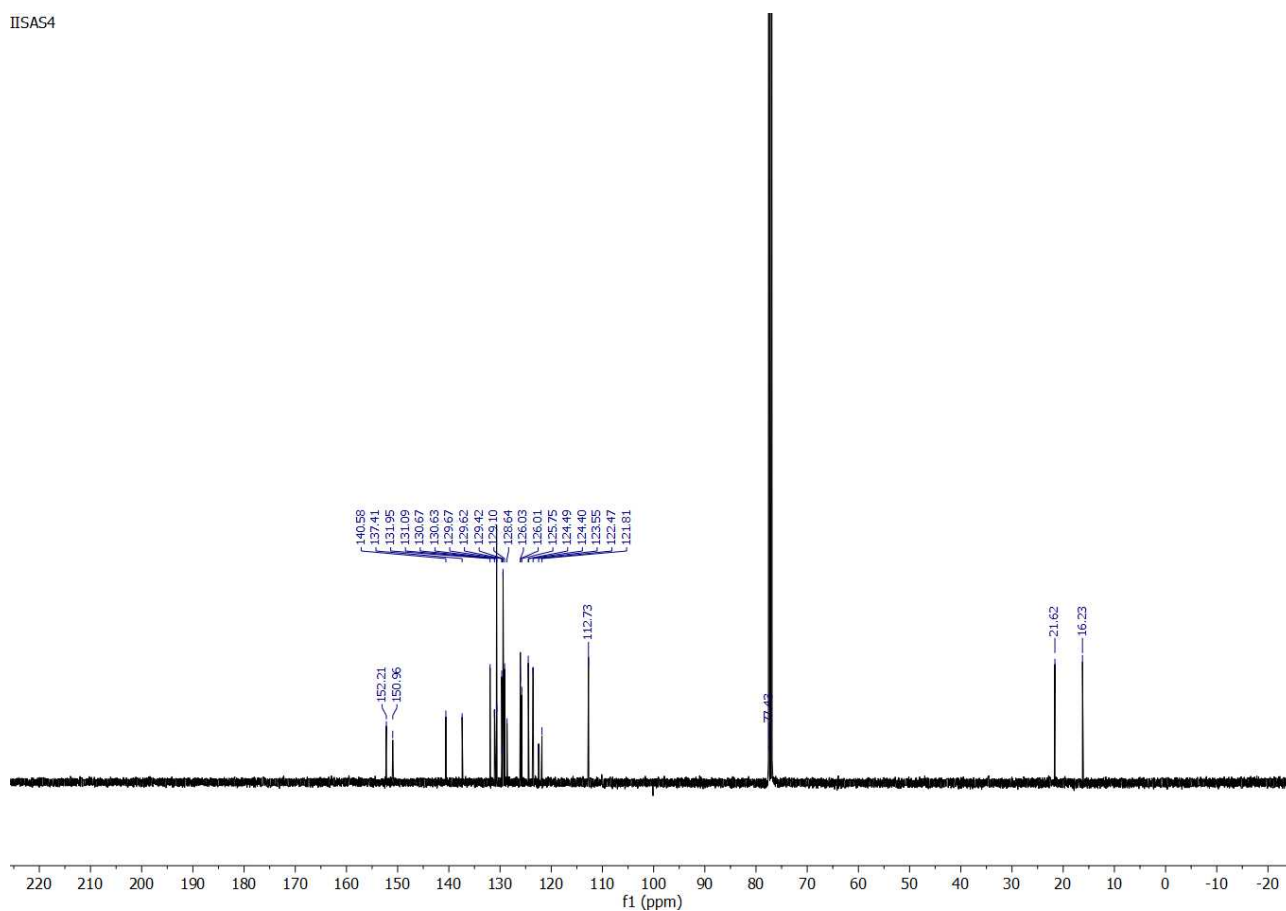

Supplement: s1 [file s1]
